# Supplementary material
Source: PubMed Central journal article supplement (PMC6628785)
Supplement: pnas.1817742116.sapp.pdf [file pnas.1817742116.sapp.pdf]

1  
2  
3  
4  
5  
6  
7  
8  
9  
10  
11  
12  
13  
14  
15  
16  
17  
18  
19  
20  
21  
22  
23  
24  
25  
26  
27  
28  
29  
30  
31  
32  
33

## Supplementary Information for

### **Arginine dephosphorylation propels spore germination in bacteria**

Bing Zhou<sup>1,2</sup>, Maja Semanjski<sup>3</sup>, Natalie Orlovetskie<sup>1</sup>, Saurabh Bhattacharya<sup>1</sup>, Sima Alon<sup>1</sup>, Liron Argaman<sup>1</sup>, Nayef Jarrous<sup>1</sup>, Yan Zhang<sup>2</sup>, Boris Macek<sup>3</sup>, Lior Sinai<sup>1,4</sup> and Sigal Ben-Yehuda<sup>1,4</sup>

<sup>1</sup>Department of Microbiology and Molecular Genetics, Institute for Medical Research Israel-Canada, The Hebrew University-Hadassah Medical School, POB 12272, The Hebrew University of Jerusalem, 91120, Jerusalem, Israel.

<sup>2</sup>College of Food Science and Nutritional Engineering, National Engineering Research Center for Fruits and Vegetables Processing, China Agricultural University, 10083, Beijing, China.

<sup>3</sup>Proteome Center Tuebingen, University of Tuebingen, Germany

Corresponding authors: Lior Sinai (lior.sinai@mail.huji.ac.il) and Sigal Ben-Yehuda (sigalb@ekmd.huji.ac.il)

#### **This PDF file includes:**

- Supplementary text
- Figs. S1 to S12
- Tables S1 to S3
- References for SI reference citations

1 **Supplementary Text**

2

3 **Supplemental materials and methods**

4 **Spore purification**

5 For ribosome purification and *in vitro* transcription experiments, spores were purified by  
6 water washing as described by Nicholson and Setlow (1). Briefly, 500 ml of 48 h DSM  
7 culture was centrifuged and washed 3 times using 200 ml of DDW. The pellet was  
8 resuspended in 100 ml of DDW and kept in 4°C with constant rotation. At the next few  
9 days the suspension was repeated washing once a day and resuspended in DDW (3  
10 washes a day). Eventually, after at least 7 days, the pellet contained spores, surrounded  
11 by a brown layer of cell debris. This layer became very viscous and tight when swirled  
12 and therefore easy to remove. The remaining pellet included almost exclusively free  
13 spores, as evaluated by phase contrast microscopy.

14 For other experiments, 3-step Histodenz gradient was used to purify spores. In  
15 brief, a 12 ml 24 h DSM culture was washed in DDW and resuspended in 1 ml of 20%  
16 Histodenz solution for 30 minutes on ice. This spore suspension was then placed on top  
17 of a two-layer gradient, made up from 2 ml 40% histodenz on top of 6 ml 50% histodenz.  
18 After centrifugation (90 min, 4,000 RPM, 23°C), a pellet was observed at the bottom of  
19 the tube. The pellet contains >99% pure spore population, as evaluated by phase contrast  
20 microscopy.

21

22 **Allelic Replacement ("pop in pop out" technique)**

23 Allelic replacement was carried out as described previously (2, 3). Briefly, to replace the  
24 WT allele of a given gene, a PCR product containing ~500 bp upstream and ~500 bp  
25 downstream of the target gene was amplified using chromosomal DNA purified from  
26 PY79 as the template. The PCR product was digested, and cloned into multiple cloning  
27 site of pMINImad2, which carries a temperature sensitive origin of replication and an  
28 erythromycin (*mls*) resistance cassette. Site directed mutagenesis was conducted on the  
29 resulting construct using appropriate primer pair and the Quickchange II kit (Stratagene).  
30 The plasmid bearing the point mutation was introduced into PY79 by single crossover  
31 integration by transformation at the restrictive temperature for plasmid replication (37°C),

1 using *mls* resistance as a selective marker. To evict the plasmid, the strain was incubated  
2 in 3 ml LB at a permissive temperature for plasmid replication (23°C) for 14 h, diluted 30  
3 fold into fresh LB, and incubated at 23°C for additional 8 h. Cells were then serially  
4 diluted and plated on LB agar at 37°C. Individual colonies were patched on both LB and  
5 LB containing *mls* plates, to identify *mls* sensitive colonies that had evicted the plasmid  
6 was purified and screened by PCR to determine which isolate had retained the mutant  
7 allele. Finally, allelic replacement was verified by DNA sequencing.

8

### 9 **Quantitative phosphoproteomic analysis**

10 Purified spores were suspended 50 mM Tris–HCl (pH 7.4) supplemented with 0.05 %  
11 SDS, Halt Protease and phosphatase inhibitors (Pierce), and lysed using Fastprep  
12 (FastPrep (MP) 6.5, 60 sec, ×3). Following cell lysis, the supernatant was additionally  
13 centrifuged at 15,000 rpm for 30 min. The protein suspension was precipitated using  
14 acetone. Protein precipitates were resuspended in a denaturation buffer containing 6 M  
15 urea and 2 M thiourea in 10 mM Tris (pH 8.0). Protein concentration was measured using  
16 standard Bradford assay (Bio-Rad). In total, 6 mg of proteins were reduced with 1 mM  
17 dithiothreitol for 1 h and subsequently alkylated with 5.5 mM iodoacetamide for 1 h in the  
18 dark at room temperature (RT). Proteins were predigested with endoproteinase Lys-C  
19 (1:100 w/w) for 3 h, then diluted with 4 volumes of water and supplemented with trypsin  
20 (1:100 w/w) for overnight digestion at RT. Digested protein sample was diluted 1:1 in 50  
21 mM heptafluorobutyric acid (HFBA), pH 8 and desalted by solid-phase extraction using  
22 Sep-Pak Vac 100 mg C18 column (Waters). For that, column was activated with  
23 methanol, washed with 70% acetonitrile and equilibrated with 25 mM HFBA, pH 8. After  
24 loading the sample, the column was washed with water and peptides were eluted with a  
25 titanium dioxide (TiO<sub>2</sub>) loading solution (300 mg/ml lactic acid, 12% v/v acetic acid,  
26 0.2% v/v HFBA, pH 4 with NH<sub>4</sub>OH). Phosphopeptide enrichment was performed with  
27 TiO<sub>2</sub> spheres (5 μm, 300 Å, ZirChrom) at pH 4 as described previously (4). Peptides were  
28 incubated with TiO<sub>2</sub> beads in 1:10 peptide to bead ratio for 10 min for 7 consecutive  
29 rounds. Phosphopeptides were eluted in two steps with 1.25% v/v NH<sub>4</sub>OH and 5% v/v  
30 NH<sub>4</sub>OH in 60% v/v acetonitrile. The pH was adjusted to 7 with formic acid and samples  
31 were concentrated by vacuum centrifugation.

1 Peptides from phosphopeptide enrichment fractions were separated by EASY-  
2 nLC 1200 system (Thermo Scientific) coupled to Q Exactive mass spectrometer (Thermo  
3 Scientific) through a nanoelectrospray ion source (Thermo Scientific). Chromatographic  
4 separation was performed on a 20 cm long, 75  $\mu\text{m}$  inner diameter analytical column  
5 packed in-house with reversed-phase ReproSil-Pur C18-AQ 1.9  $\mu\text{m}$  particles (Dr. Maisch  
6 GmbH) at 40°C. Peptides were loaded onto the column at a flow rate of 700 nL/min with  
7 solvent A (0.1% v/v formic acid) under maximum back-pressure of 850 bar. Peptides  
8 were eluted using 46 min segmented analytical gradient of 10–50% solvent B (80% v/v  
9 acetonitrile, 0.1% v/v formic acid) at a constant flow rate of 200 nL/min. Peptides were  
10 ionized by nanoelectrospray ionization at 2.3 kV and the capillary temperature of 275°C.  
11 The mass spectrometer was operated in a data-dependent mode, switching between one  
12 MS and subsequent MS/MS scans of 7 (Top7 method) most abundant peaks selected with  
13 an isolation window of 1.4 m/z. MS spectra were acquired in a mass range from 300–  
14 1650 m/z with a maximum injection time (IT) of 25 ms and a resolution of 60,000  
15 (defined at m/z 200). The higher energy collisional dissociation (HCD) MS/MS spectra  
16 were recorded with the maximum IT of 220 ms, resolution of 60,000 and a normalized  
17 collision energy of 27%. The masses of sequenced precursor ions were dynamically  
18 excluded for fragmentation for 30 sec. Ions with single, unassigned or 6 and higher  
19 charge states were excluded from fragmentation.

20 Raw MS data was processed using a MaxQuant software suite (version 1.5.2.8)  
21 (5). Derived peak list was searched using Andromeda search engine integrated in  
22 MaxQuant (6) against a reference *B. subtilis* proteome (taxonomy ID 1423) obtained  
23 from UniProt (4,207 protein entries, released in October 2015), and a file containing 245  
24 common laboratory contaminants implemented in MaxQuant. During the first search,  
25 peptide mass tolerance was set to 20 ppm and in the main search to 4.5 ppm. The  
26 minimum required peptide length was set to 7 amino acids. Trypsin was set to cleave at  
27 lysine and arginine C-terminus with the maximum of three missed cleavages.  
28 Carbamidomethylation of cysteines was set as a fixed modification and methionine  
29 oxidation, protein N-terminal acetylation and Ser/Thr/Tyr/Arg (STYR) phosphorylation  
30 were defined as variable modifications. Neutral loss was defined for STR and diagnostic  
31 peak for Y phosphorylation. Peptide, protein and modification site identifications were

1 filtered using a target-decoy approach at FDR set to 0.01 (7). Phosphorylation sites in  
2 Phospho(STYR)Sites.txt file were filtered for Andromeda score of  $\geq 50$  and localization  
3 probability of  $\geq 0.75$  to obtain high confidence data. Best identified MS/MS spectra of all  
4 18 peptides phosphorylated on arginine were manually inspected and provided in Table  
5 S1.

6

### 7 **Ribosome purification**

8 Ribosome purification was carried out by chromatography method as described  
9 previously (8), in which cysteine-Sulfolink resin was employed for covalent  
10 immobilization of ribosome. Sulfolink resin is a cross-linked agarose resin (CL-6B) with  
11 18-atom alkyl chains carrying a reactive iodoacetyl group at their terminus. All of the  
12 alkyl chains were reacted with cysteine to produce the resin. In brief, 2 ml of 50% slurry  
13 of Sulfolink coupling gel were placed in 15 ml tubes and centrifuged (5 min, 4000 RPM),  
14 and then the storage buffer was carefully decanted. The gel was washed (x3) with 3 ml  
15 sulfolink coupling buffer (50mM Tris, 5mM EDTA-Na, pH 8.5). Next, 3 ml of 50 mM L-  
16 cysteine in coupling buffer was added to the gel and the slurry was gently shaken for 1 h  
17 at room temperature. Next, residual cysteine was removed by centrifugation (5 min, 4000  
18 RPM). 2 ml binding buffer (10 mM Tris-HCl at pH 7.5, 10 mM MgCl<sub>2</sub>, 60 mM NH<sub>4</sub>Cl)  
19 was added to the cysteine-Sulfolink resin gel and this gel was packed in Polyprep  
20 columns (Bio-Rad) and pre-equilibrated. Cell extracts from vegetative cells, dormant and  
21 germinating spores were loaded onto the column, and allowed to flow through by gravity  
22 at 4°C. The ribosome in the cell extracts were bound to the cysteine-Sulfolink resin in the  
23 column. The columns were washed with 5x1 ml portions of the same buffer to remove  
24 the nonspecific binding to cysteine-Sulfolink resin and then eluted with 5x1 ml portions  
25 of the same buffer supplemented with 0.5 M NH<sub>4</sub>Cl to obtain purified ribosome, and 0.5  
26 ml fractions were collected.

27

### 28 **BONCAT spore germination experiments**

29 Cultures of 10 ml of dormant or germinating spores were centrifuged and washed with  
30 PBS x 1. Pellets were resuspended in PBS x 1 supplemented with protease inhibitors  
31 (Thermo, 78439), lysed using Fastprep [FastPrep (MP) 6.5, 60 seconds, x3], and

1 centrifuged (5 min, 14,000 RPM). Supernatants containing a mixed population of AHA-  
2 labeled newly synthesized proteins and unlabeled pre-existing proteins were collected.  
3 The enrichment for newly synthesized proteins was performed using BONCAT as  
4 previously described (9, 10). For tagging of AHA-labeled proteins, samples were  
5 incubated overnight at 4°C with triazole ligand (0.25 mM, Sigma), alkyne-bearing biotin-  
6 flag tag (0.063 mM, Genscript) and CuBr (2 mM in DMSO, Sigma).

### 8 **Quantitative Real time PCR (qRT-PCR)**

9 Spore cultures (10 ml) were washed (x3) with PBS×1 and RNA was extracted using  
10 FastRNA Pro Blue kit (MP Biomedicals) as described previously (11). Extracted RNA (2  
11 µg) was treated with RQ1 DNase (Promega) and subjected to cDNA synthesis using  
12 iScript cDNA synthesis kit (Bio-Rad), according to the manufacturer protocol. qRT-PCR  
13 reactions were conducted using SYBR-green mix (Bio Rad), and fluorescence detection  
14 was performed using CFX Connect Real-Time PCR Detection System (Bio-Rad),  
15 according to manufacturer instructions. qRT-PCR primers (Table S3) were designed  
16 using Primer3 software (v.0.4.0, available on-line). *yoxA* gene was used to normalize  
17 expression data, as its expression was unchanged throughout germination as indicated by  
18 qRT-PCR analysis. The relative gene expression levels were calculated from threshold  
19 cycle ( $C_T$ ) values using the  $2^{-\Delta\Delta CT}$  method (12). Each assay was performed in duplicates  
20 with at least two RNA templates prepared from independent biological repeats.

### 22 **Western blot analysis**

23 Proteins were extracted from vegetative cells, dormant or germinating spores as described  
24 in “**Quantitative phosphoproteomic analysis**”. Extracts were incubated at 100°C for 10  
25 min with Laemmli sample buffer. Proteins were separated by SDS-PAGE 12.5% and  
26 electroblotted onto a polyvinylidene difluoride (PVDF) transfer membrane  
27 (Immobilon-P; Millipore). For Immunoblot analysis of GFP or mCherry fusion proteins,  
28 membranes were blocked for 1 hr at room temperature (0.05% Tween-20, 5% skim milk  
29 in TBSx1). Blots were then incubated for 1.5 h at room temperature with polyclonal  
30 rabbit anti-GFP or anti-mCherry antibodies (1:10,000 in 0.05% Tween-20, 5% skim milk  
31 in TBSx1). Next, membranes were incubated for 1 h at room temperature with peroxidase

1 conjugated goat anti-rabbit secondary antibody (Bio-Rad) (1:10,000 in 0.05% Tween-20,  
2 5% skim milk in). EZ-ECL kit (Biological Industries, Beit Haemek, Israel) was used for  
3 final detection.

#### 4 5 **Determination of the levels of spore germination proteins**

6 Expression levels of germination receptor subunits (GerAA, GerAC, GerBC and GerKA)  
7 and SpoVAD were detected by Western blot analyses using rabbit antibodies against  
8 these proteins and a secondary antibody, as described previously (13). Briefly, 125 ODs  
9 of spores were decoated at 70°C for 2 hrs with decoating solution (0.1 M DTT, 0.1 M  
10 NaCl, 0.1 M NaOH, 1% SDS), followed by 10 water washes. The decoated spores were  
11 lysed with 1 mg lysozyme, 1 mM PMSF, 1µg RNase, 1 µg Dnase I, and 20 µg of MgCl<sub>2</sub>  
12 in 0.5 ml TEP buffer (50mM Tris-HCl pH 7.4, 5 mM EDTA) at 37°C for 5 min, and then  
13 incubated on ice for 20 min. The lysed spores were then disrupted using Fastprep (MP)  
14 (6.5, 60 seconds, x3), and 100 µL of the lysate was added to 100 µl Laemmli sample  
15 buffer containing 55 mM DTT (425 µL BioRad 161-0737 plus 25 µL 1 M DTT) and  
16 incubated at 23°C for one hour. Western blot analysis was carried out as described above,  
17 using rabbit antibodies against these proteins and a secondary antibody.

#### 18 19 ***In vitro* transcription**

20 Lysates were extracted from vegetative cells, dormant and germinated spores as  
21 described above for ribosome purification. Samples from vegetative cells, dormant spores  
22 and germinating spores were collected by centrifugation, washed with transcription  
23 buffer supplemented with protease inhibitors (Thermo, 78439), and lysed using Fastprep  
24 (FastPrep (MP) 6.5, 60 sec, ×3). Following cell lysis, the supernatant was additionally  
25 centrifuged at 15,000 rpm for 15 min to obtain extracts. The extracts were dialyzed for 2  
26 h against 200 volumes of dialyzed buffer (0.01 M Tris-HCl (pH 8.2), 0.014 M  
27 magnesium chloride, 0.06 M KCl, 0.001 M dithiothreitol, 20% glycerol, and 2 mM  
28 pefablock sc). These dialyzed extracts were stored at -80°C until usage.

29 *In vitro* transcription reactions were performed in a final volume of 25 µL that  
30 contained 15 µL of extract, 1× transcription buffer (12 mM Tris-HCl at pH 7.9, 5 mM  
31 MgCl<sub>2</sub>, 80 mM KCl, 0.5 mM DTT, 20 mM creatine phosphate), NTPs (0.5 mM ATP, 0.5

1 mM CTP, 0.05 mM GTP, 0.5 mM UTP), 10  $\mu$ Ci of [ $\alpha$ -<sup>32</sup>P]-UTP (3000 Ci/mmol; Perkin Elmer), and 0.25–0.5  $\mu$ g of PCR products carrying ~500 bp upstream and ~ the first 400 bp of the desired gene (*recA*), providing an additional external template. After 40 min of incubation at 37°C, reaction mixtures were diluted 1:1 with H<sub>2</sub>O, passed through a G-50 column, diluted to 250  $\mu$ L with 1 $\times$  digestion buffer (20 mM Tris-HCl at pH 7.9, 250 mM sodium acetate, 1 mM EDTA, 0.25% SDS), and digested with 120  $\mu$ g/mL Proteinase K for 30 min at 37°C. Reaction products were recovered following 25:24:1 phenol:chloroform:isoamylalcohol extraction by ethanol precipitation. Labeled RNAs were analyzed in 8% polyacrylamide gels, and bands were visualized by autoradiography.

11

## 12 Northern Blot of mRNA

13 Northern blot was carried out as described previously (14, 15). In brief, total RNA  
14 (20~30  $\mu$ g) was denatured for 10 min at 70°C in formamide loading buffer, separated on  
15 an agarose gel (1.4% in MOPS buffer), and transferred to Zeta-Probe GT membranes  
16 (Bio-Rad Laboratories) by capillary blotting overnight. Membranes were then UV auto-  
17 crosslinked, and hybridized overnight at 42°C with the corresponding biotinylated probes  
18 (~30 nM) (Table S3) in ULTRAhyb Hybridization Buffer (ThermoFisher). Membranes  
19 were then further incubated with a streptavidin-conjugated Horseradish Peroxidase (HRP)  
20 (1:3000 in 0.5% SDS, 0.1% I-Block reagent in PBSx1, abcam, Israel). The blot was  
21 developed using EZ-ECL kit (Biological Industries, Beit Haemek, Israel) according to the  
22 manufacturer's instructions.

23

## 24 Plasmid Construction

### 25 pMINImad2 (3)

26 pBZ100 (*tig erm amp oriBsTs*), constructed by amplifying genomic region containing  
27 ~500 bp upstream and ~500 bp downstream of the *tig-R45* site with primer pair *tig*-  
28 BamHI-U/*tig*-Sall-L. The PCR product was digested with BamHI and Sall, and cloned  
29 into the BamHI and Sall sites of pMINImad2, which carries a temperature sensitive  
30 origin of replication and an erythromycin (*mls*) resistance cassette.



1 **pBZ98** (*tig-R45A erm amp oriBsTs*), to change the codon encoding R45 to a codon  
2 encoding Ala, site directed mutagenesis was conducted on pBZ100 using primer pair *tig-*  
3 *R45A-F/tig-R45A-R* and the Quickchange II kit (Stratagene). Plasmid was sequenced to  
4 verify the presence of the mutation.

5 **pBZ97** (*tig-R45D erm amp oriBsTs*), to change the codon encoding R45 to a codon  
6 encoding Asp, site directed mutagenesis was conducted on pBZ100 using primer pair *tig-*  
7 *R45D-F/tig-R45D-R* and the Quickchange II kit (Stratagene). Plasmid was sequenced to  
8 verify the presence of the mutation.

9 **pBZ200** (*sigA erm amp oriBsTs*), constructed by amplifying genomic region containing  
10 ~500 bp upstream and ~500 bp downstream of the *sigA-R365* site with primer pair *sigA-*  
11 *BamHI-U/sigA-SalI-L*. The PCR product was digested with BamHI and SalI, and cloned  
12 into the BamHI and SalI sites of pMINImad2.

13 **pBZ90** (*sigA-R365A erm amp oriBsTs*), to change the codon encoding R45 to a codon  
14 encoding Ala, site directed mutagenesis was conducted on pBZ200 using primer pair  
15 *sigA-R365A-F/sigA-R365A-R* and the Quickchange II kit (Stratagene). Plasmid was  
16 sequenced to verify the presence of the mutation.

17 **pBZ91** (*sigA-R365D erm amp oriBsTs*), to change the codon encoding R45 to a codon  
18 encoding Asp, site directed mutagenesis was conducted on pBZ200 using primer pair  
19 *sigA-R365D-F/sigA-R365D-R* and the Quickchange II kit (Stratagene). Plasmid was  
20 sequenced to verify the presence of the mutation.

21 **pBZ141** (*tig-R45E erm amp oriBsTs*), to change the codon encoding R45 to a codon  
22 encoding Glu, site directed mutagenesis was conducted on pBZ100 using primer pair *tig-*  
23 *R45E-F/tig-R45E-R* and the Quickchange II kit (Stratagene). Plasmid was sequenced to  
24 verify the presence of the mutation.

25 **pBZ143** (*sigA-R365E erm amp oriBsTs*), to change the codon encoding R45 to a codon  
26 encoding Glu, site directed mutagenesis was conducted on pBZ200 using primer pair  
27 *sigA-R365E-F/sigA-R365E-R* and the Quickchange II kit (Stratagene). Plasmid was  
28 sequenced to verify the presence of the mutation.

29 **pAR5** (*rpsB-mCherry-kan*) (16)

30 **pAR68** (*pupG-gfp-spc*) laboratory stock

31 **pDB27** (*rplA-dronpa-spc*) (17)

1 **pLS146** (*rpmE-dronpa-spc*), containing the 3' region of *rpmE* fused to *dronpa*, was  
2 constructed by amplifying the 3' region of *rpmE* gene by PCR using primers 3019 and  
3 3020, which replaced the stop codon with a XhoI site. The PCR-amplified DNA was  
4 digested with EcoRI and XhoI and was cloned into the EcoRI and XhoI sites of pDB27  
5 (*spc*), which contains the *dronpa* coding sequence.  
6

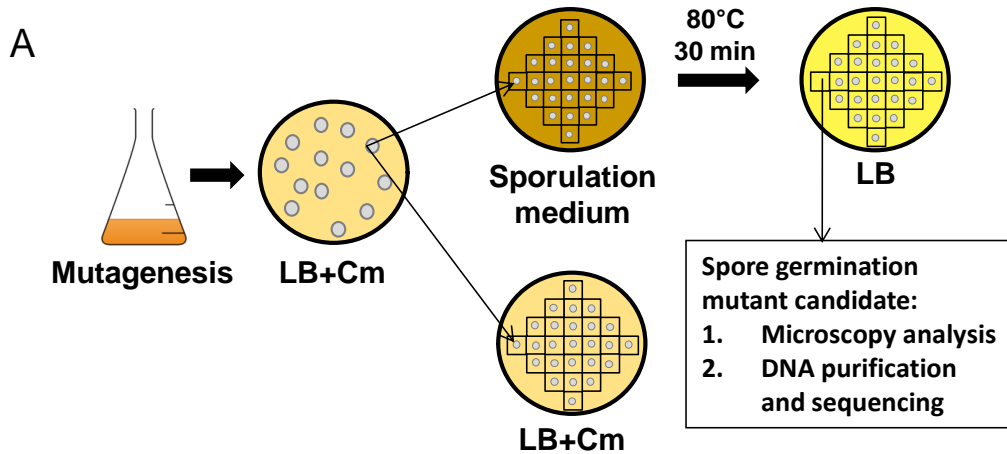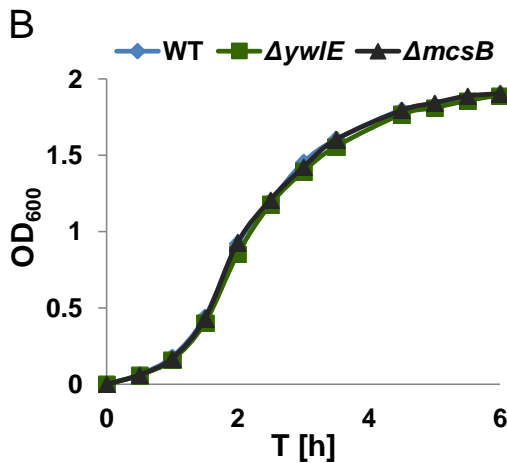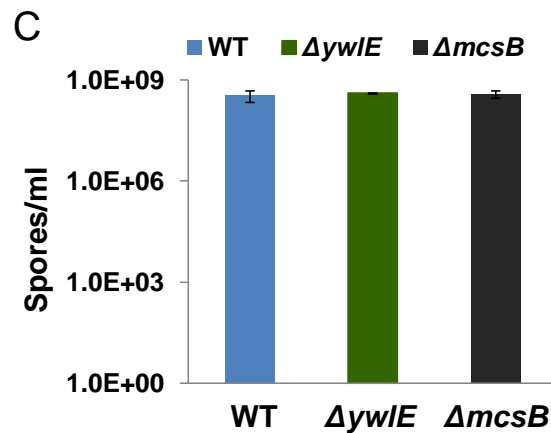

1

2 **Fig. S1: Screening for mutants perturbed in spore germination**

3 (A) A schematic description of transposon mutagenesis strategy, screening for mutants  
 4 deficient in germination. DS8274 strain was grown in LB medium overnight, and cells  
 5 plated on LB+chloramphenicol (LB+cm) plates at 48°C to allow transposition and the  
 6 formation of mutant colonies. Each colony was streaked onto LB+cm plate (source plate)  
 7 and DSM plate (sporulation plate), and the plates were incubated at 30°C. After 6 days  
 8 DSM plates were incubated at 80°C for 30 min to kill the non-sporulated cells. Heated  
 9 DSM colonies were then replicated into fresh LB plates to allow revival. Candidates that  
 10 could not revive on LB plates were further examined using light microscopy to exclude

1 sporulation mutants, and those that sporulated well were considered as revival mutants.  
2 Candidates were recovered from the source LB+Cm plate for DNA purification and  
3 sequencing.

4 (B) PY79 (WT), BZ16 ( $\Delta ywIE$ ), and BZ129 ( $\Delta mcsB$ ) strain cultures were diluted to  
5  $OD_{600}=0.05$  in LB medium, incubated at 37°C and  $OD_{600}$  was measured during growth at  
6 the indicated time points. Shown is a representative out of 3 independent biological  
7 repeats.

8 (C) PY79 (WT), BZ16 ( $\Delta ywIE$ ), and BZ129 ( $\Delta mcsB$ ) strains were induced to sporulate in  
9 DSM for 24 h. Next, cultures were subjected to heat kill treatment (80°C, 30 min), serial  
10 decimal dilutions were plated on LB, and colonies were scored after 24 h. Presented are  
11 the averaged numbers and SD of spores/ml from 3 independent biological repeats.

12

13

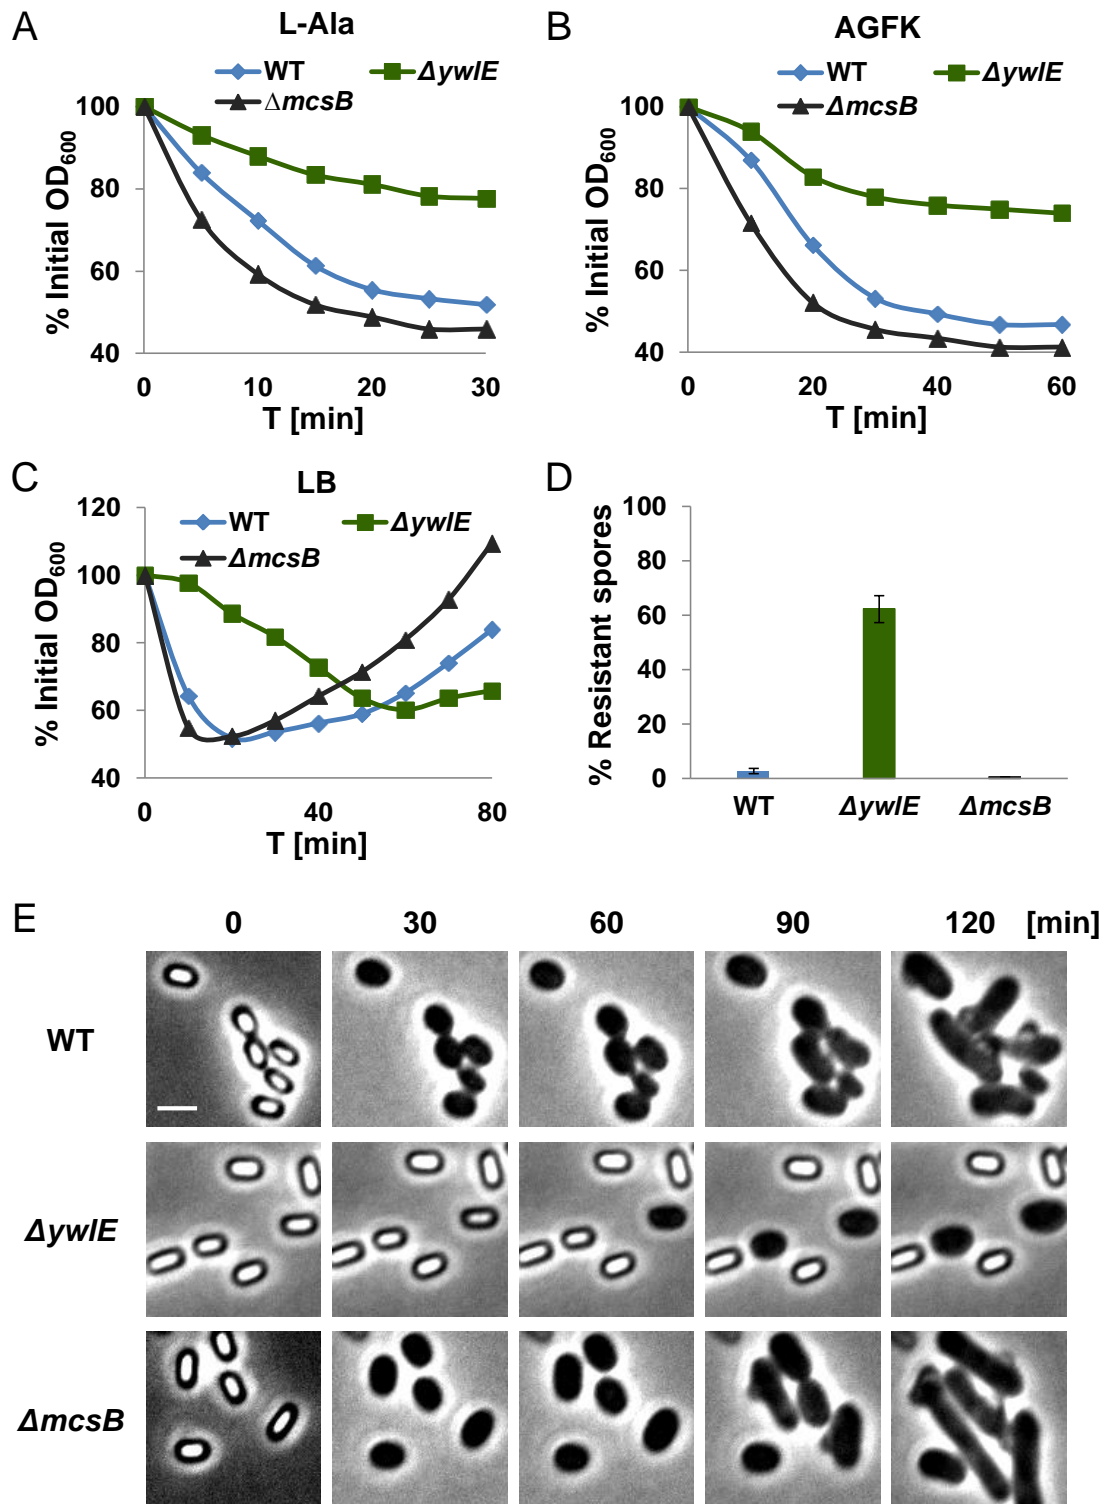

1

2 Fig. S2: Spore germination is facilitated by arginine dephosphorylation

1 (A-C) Spores of PY79 (WT), BZ16 ( $\Delta ywIE$ ) and BZ129 ( $\Delta mcsB$ ) strains were incubated  
2 with L-Ala (10 mM) (A), AGFK (B), or LB (C) and OD<sub>600</sub> was measured at the indicated  
3 time points. Data are presented as percentage of the initial OD<sub>600</sub> of spore suspension.  
4 Germination assays were carried out in triplicates, and representative data are presented.  
5 Decreasing OD<sub>600</sub> signifies spore germination.

6 (D) Spores of PY79 (WT), BZ16 ( $\Delta ywIE$ ) and BZ129 ( $\Delta mcsB$ ) strains were  
7 supplemented with L-Ala for 10 min, and incubated at 80°C for 30 min. The percentage  
8 of non-germinating heat resistant spores was determined by the number of colonies after  
9 heat treatment/ number of colonies before heat treatment.

10 (E) Spores of PY79 (WT), BZ16 ( $\Delta ywIE$ ) and BZ129 ( $\Delta mcsB$ ) strains were incubated on  
11 LB agar and monitored by time lapse microscopy. Shown are phase contrast images from  
12 a representative experiment out of 3 independent biological repeats. Scale bar represents  
13 1  $\mu$ m.  
14

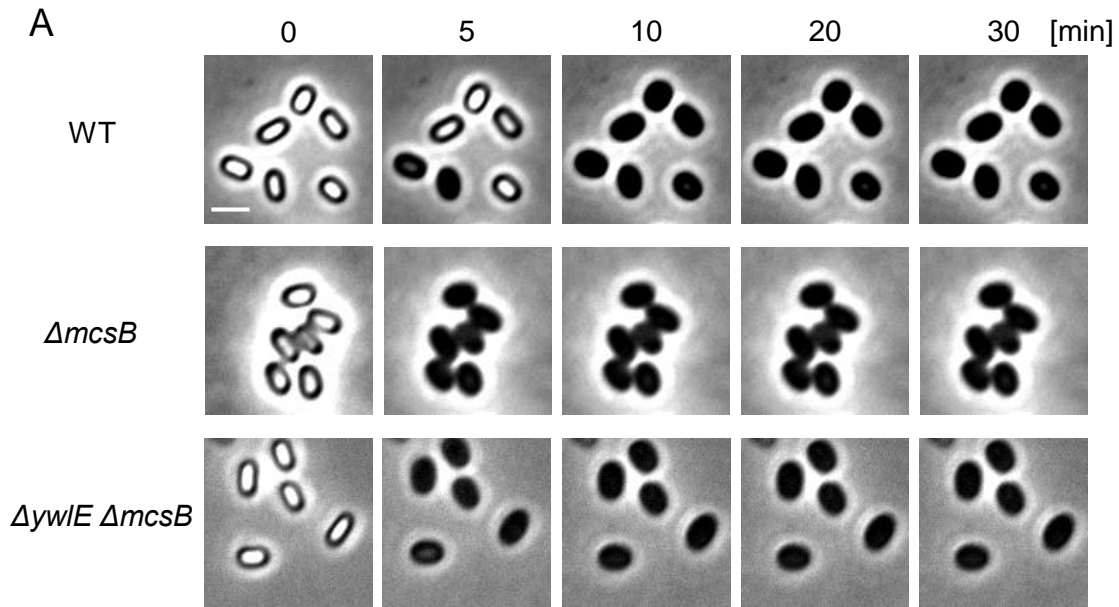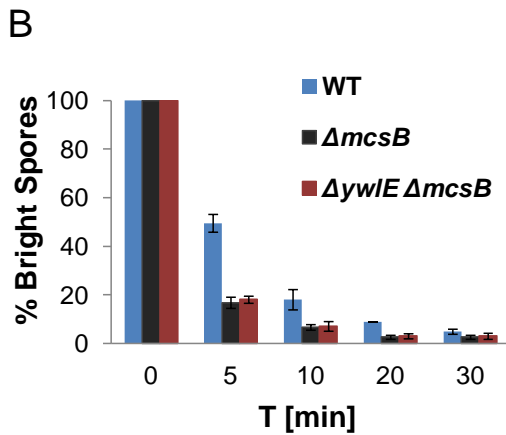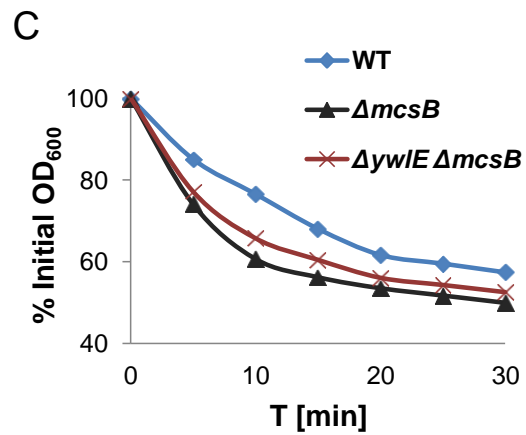

1

2 **Fig. S3: McsB is the major kinase for the arginine phosphorylation sites detected in**  
 3 **the  $\Delta ywlE$  strain during germination**

4 (A) Spores of PY79 (WT), BZ129 ( $\Delta mcsB$ ) and BZ130 ( $\Delta ywlE \Delta mcsB$ ) were incubated  
 5 on agarose supplemented with L-Ala (10 mM) and monitored by time lapse microscopy.  
 6 Shown are phase contrast images from a representative experiment out of 3 independent  
 7 biological repeats. Scale bar represents 1  $\mu\text{m}$ .

1 (B) Spores of PY79 (WT), BZ129 ( $\Delta mcsB$ ) and BZ130 ( $\Delta ywI E \Delta mcsB$ ) strains were  
2 incubated on agarose supplemented with L-Ala (10 mM) and monitored by time lapse  
3 microscopy. Data are presented as percentage of the initial number of the phase bright  
4 spores. Shown are average values and SD obtained from 3 independent biological repeats  
5 ( $n \geq 300$  for each strain).

6 (C) Spores of PY79 (WT), BZ129 ( $\Delta mcsB$ ) and BZ130 ( $\Delta ywI E \Delta mcsB$ ) strains were  
7 incubated with L-Ala (10 mM) and  $OD_{600}$  was measured at the indicated time points.  
8 Data are presented as percentage of the initial  $OD_{600}$  of spore suspension. Germination  
9 assays were carried out in triplicates, and representative data are presented. Decreasing  
10  $OD_{600}$  signifies spore germination.

11

12

13



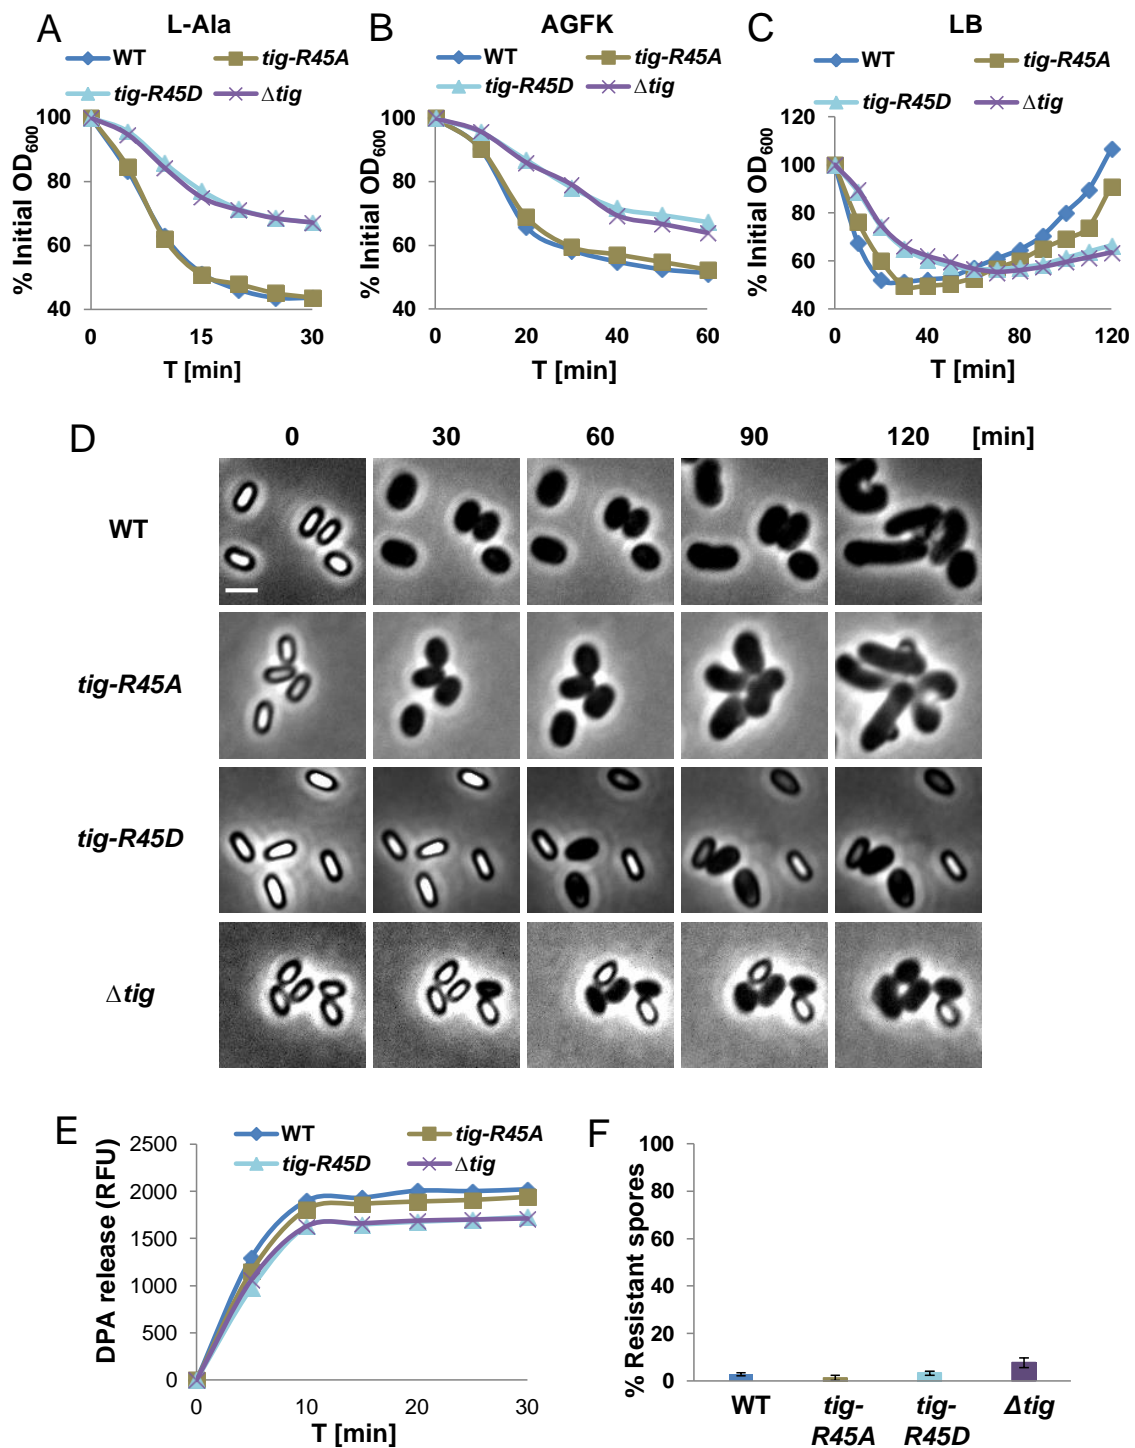

1

2 **Fig. S4: Dephosphorylation of Tig drives spore germination**

3 (A-C) Spores of PY79 (WT), BZ98 (*tig-R45A*), BZ97 (*tig-R45D*) and LS38 ( $\Delta$ *tig*) strains

4 were incubated with L-Ala (10 mM) (A), AGFK (B), or LB (C) and OD<sub>600</sub> was measured

1 at the indicated time points. Data are presented as percentage of the initial OD<sub>600</sub> of spore  
2 suspension. Germination assays were carried out in triplicates, and representative data are  
3 presented.

4 (D) Spores of PY79 (WT), BZ98 (*tig-R45A*), BZ97 (*tig-R45D*) and LS38 ( $\Delta$ *tig*) strains  
5 were incubated on LB agar and monitored by time lapse microscopy. Shown are phase  
6 contrast images from a representative experiment out of 3 independent biological repeats.  
7 Scale bar represents 1  $\mu$ m.

8 (E) Spores of PY79 (WT), BZ98 (*tig-R45A*), BZ97 (*tig-R45D*) and LS38 ( $\Delta$ *tig*) strains  
9 were incubated with L-Ala to trigger germination. DPA release to the medium was  
10 determined by Tb-DPA assay. Presented are relative fluorescence units (RFU) measured  
11 at 545 nm with excitation at 270 nm. Shown is a representative experiment out of 3  
12 independent biological repeats.

13 (F) Spores of PY79 (WT), BZ98 (*tig-R45A*), BZ97 (*tig-R45D*) and LS38 ( $\Delta$ *tig*) strains  
14 were supplemented with L-Ala for 10 min and then incubated at 80°C for 30 min. The  
15 percentage of non-germinating heat resistant spores was determined by the number of  
16 colonies after heat treatment/ number of colonies before heat treatment.

17

18

19

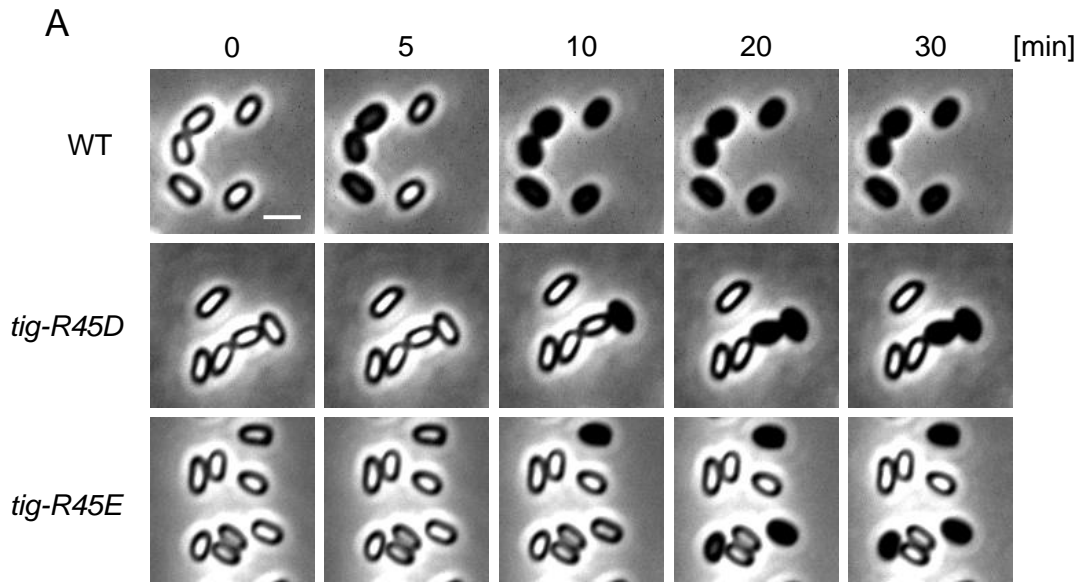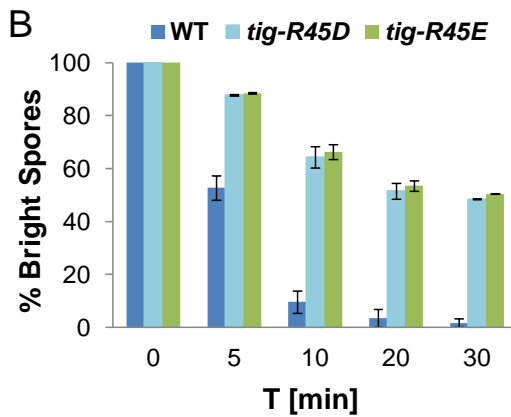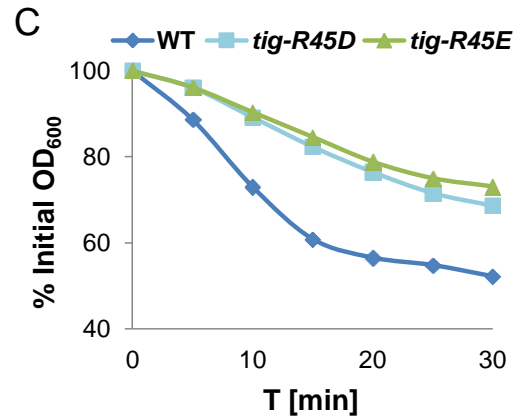

1

2 **Fig. S5: *tig-R45E* mutant spores shows germination defects similar to that of spores**  
 3 **harboring *tig-R45D***

4 (A) Spores of PY79 (WT), BZ97 (*tig-R45D*) and BZ141 (*tig-R45E*) were incubated on  
 5 agarose supplemented with L-Ala (10 mM) and monitored by time lapse microscopy.

6 Shown are phase contrast images from a representative experiment out of 3 independent

7 biological repeats. Scale bar represents 1  $\mu\text{m}$ .

1 (B) Spores of PY79 (WT), BZ97 (*tig-R45D*) and BZ141 (*tig-R45E*) strains were  
2 incubated on agarose supplemented with L-Ala (10 mM) and monitored by time lapse  
3 microscopy. Data are presented as percentage of the initial number of the phase bright  
4 spores. Shown are average values and SD obtained from 3 independent biological repeats  
5 ( $n \geq 300$  for each strain).

6 (C) Spores of PY79 (WT), BZ97 (*tig-R45D*) and BZ141 (*tig-R45E*) strains were  
7 incubated with L-Ala (10 mM) and OD<sub>600</sub> was measured at the indicated time points.  
8 Data are presented as percentage of the initial OD<sub>600</sub> of spore suspension. Germination  
9 assays were carried out in triplicates, and representative data are presented. Decreasing  
10 OD<sub>600</sub> signifies spore germination.

11

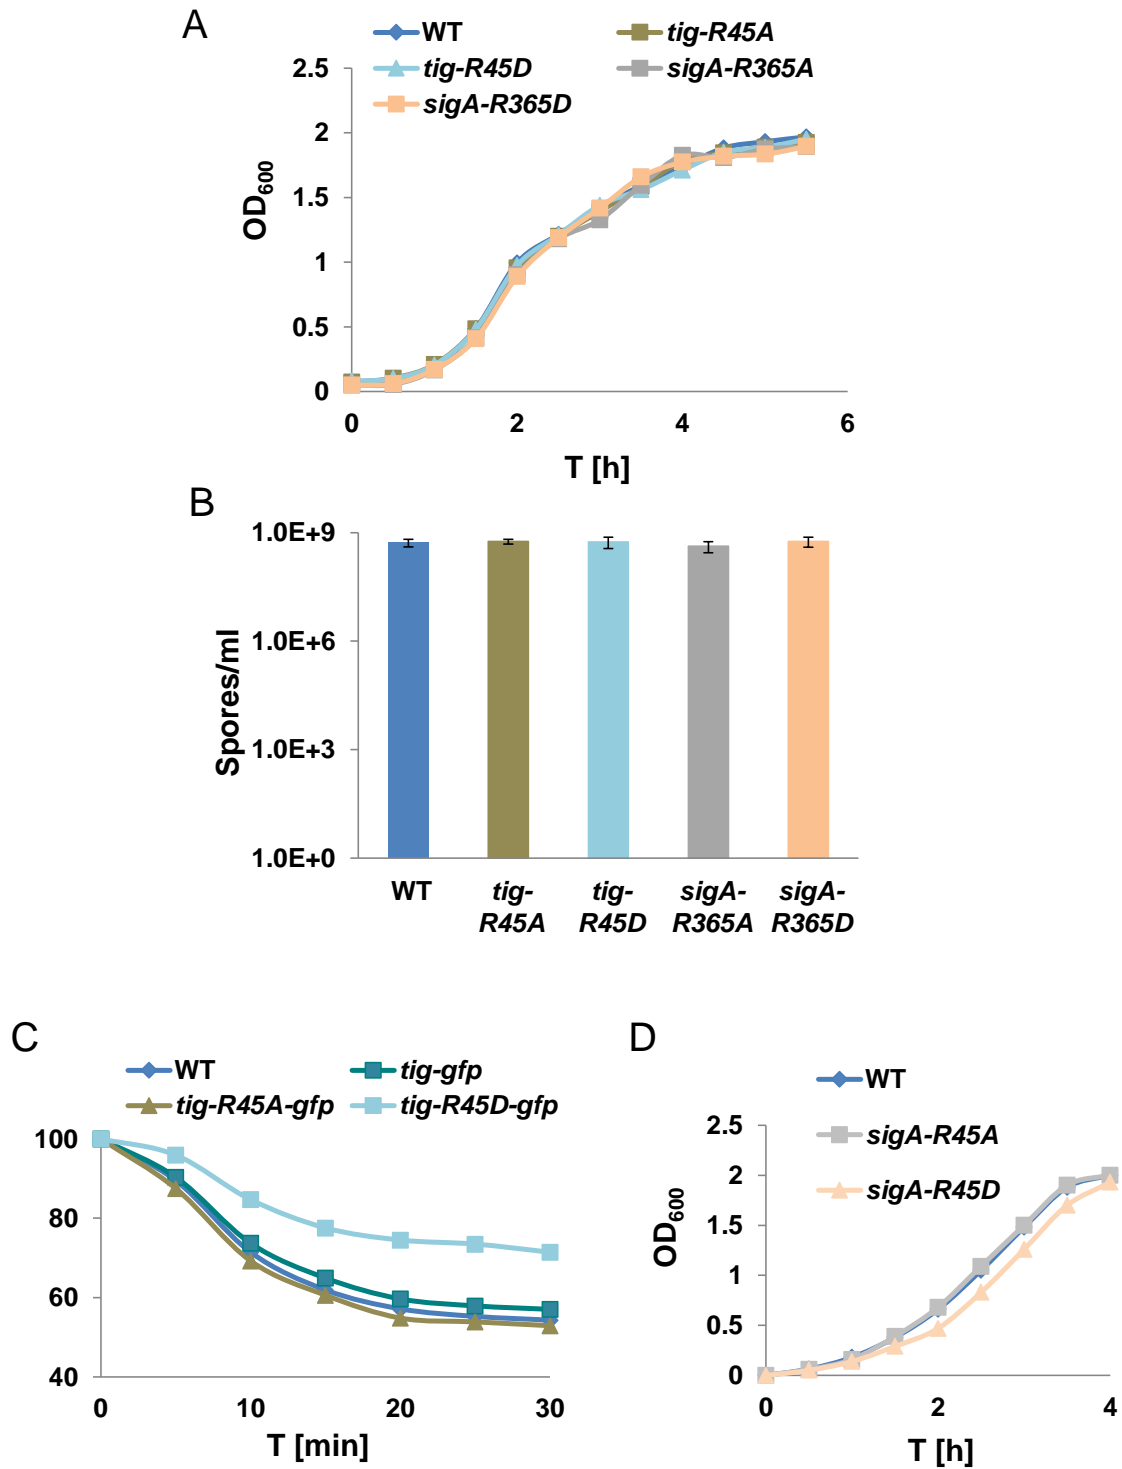

1

2 Fig. S6: characterization of *tig* and *sigA* mutants

1 (A) PY79 (WT), BZ98 (*tig-R45A*), BZ97 (*tig-R45D*), BZ90 (*sigA-R365A*) and BZ91  
2 (*sigA-R365D*) strain cultures were diluted to  $OD_{600}=0.05$  in LB medium, incubated at  
3  $37^{\circ}C$  and  $OD_{600}$  was measured during growth at the indicated time points.

4 (B) PY79 (WT), BZ98 (*tig-R45A*), BZ97 (*tig-R45D*), BZ90 (*sigA-R365A*) and BZ91  
5 (*sigA-R365D*) strains were induced to sporulate in DSM for 24 h. Next, cultures were  
6 subjected to heat kill treatment ( $80^{\circ}C$ , 30 min), serial decimal dilutions were plated on  
7 LB and colonies were scored after 24 h. Presented are the averaged numbers and SD of  
8 spores/ml from 3 independent biological repeats.

9 (C) Spores of PY79 (WT), LS50 (*tig-gfp*), BZ108 (*tig-R45D-gfp*) and BZ109 (*tig-R45A-*  
10 *gfp*) strains were incubated with L-Ala (10 mM) and  $OD_{600}$  was measured at the indicated  
11 time points. Data are presented as percentage of the initial  $OD_{600}$  of spore suspension.  
12 Decreasing  $OD_{600}$  signifies spore germination.

13 (D) PY79 (WT), BZ90 (*sigA-R365A*) and BZ91 (*sigA-R365D*) strain cultures were  
14 diluted to  $OD_{600}=0.05$  in S7 medium, incubated at  $37^{\circ}C$  and  $OD_{600}$  was measured during  
15 growth at the indicated time points.

16

17

18

19

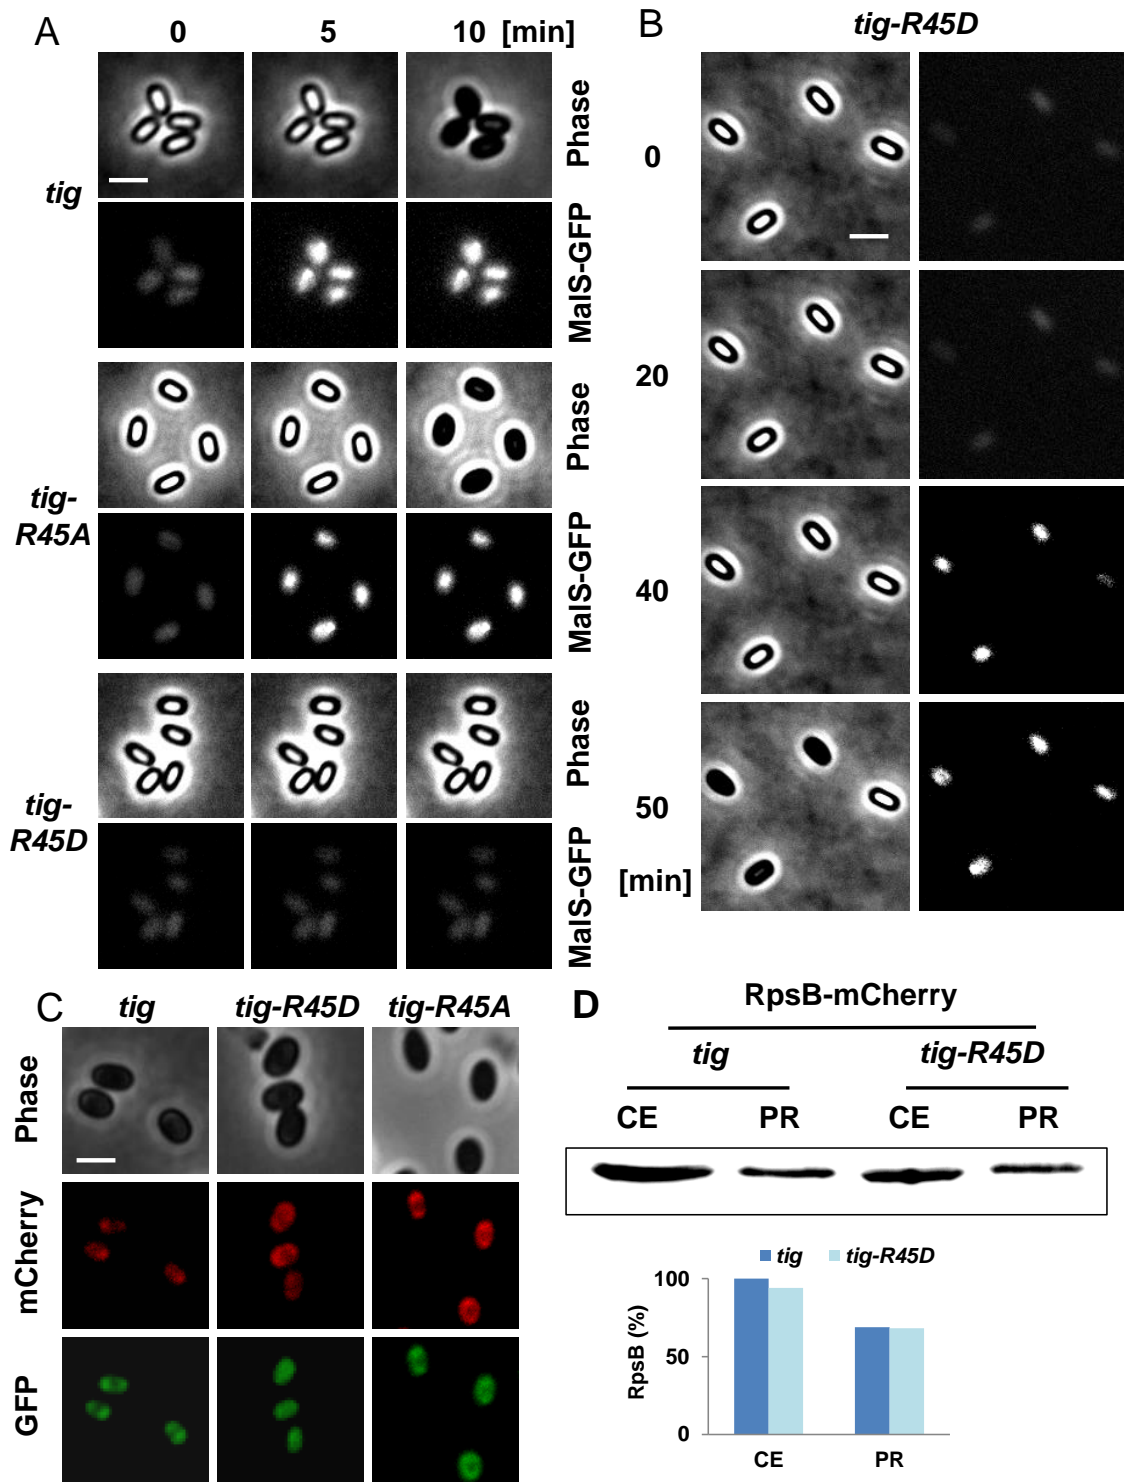

1

2 Fig. S7: The impact of Tig phosphorylation state on protein synthesis during spore

3 germination

1 (A-B) Spores of AR71 (WT, *malS-gfp*), BZ107 (*tig-R45A, malS-gfp*) and BZ106 (*tig-*  
2 *R45D, malS-gfp*) strains were incubated on agar with L-Ala and followed by time lapse  
3 microscopy. Shown are phase contrast and fluorescence from MalS-GFP images taken at  
4 the indicated time points. For each strain, images were scaled to the same intensity range.  
5 A representative experiment out of three independent biological repeats is shown. Scale  
6 bars represent 1  $\mu\text{m}$ .

7 (C) Spores of BZ118 (*tig-gfp, rpsB-mCherry*), BZ120 (*tig-R45A-gfp, rpsB-mCherry*) and  
8 BZ119 (*tig-R45D-gfp, rpsB-mCherry*) strains were incubated with 10 mM L-Ala and  
9 observed by microscopy at indicated time points. Shown is phase contrast (Phase),  
10 fluorescence from mCherry (red) and from GFP (green) images. For BZ118 and BZ120,  
11 the images were taken at 10 min after germination induction. For BZ119, the images  
12 were taken at 60 min after germination induction. Shown are images from a  
13 representative experiment out of 3 independent biological repeats. Scale bar represents 1  
14  $\mu\text{m}$ .

15 (D) Intact ribosomes were purified from the cell extracts (CE) of the vegetative cells of  
16 BZ118 (*tig-gfp, rpsB-mCherry*) and BZ119 (*tig-R45D-gfp, rpsB-mCherry*) strains.  
17 Shown is a Western blot analysis carried out using antibody against mCherry to detect the  
18 levels of RpsB in cell extracts (CE) and in purified ribosomes (PR) (Upper panel). Signal  
19 from mCherry fusion proteins was quantified by MetaMorph software (version 7.7,  
20 Molecular Devices) (Lower panel). The signal from RpsB-mCherry in CE from BZ118  
21 (*tig-gfp*) was considered as 100%. Shown is a representative experiment out of two  
22 biological repeats.

23



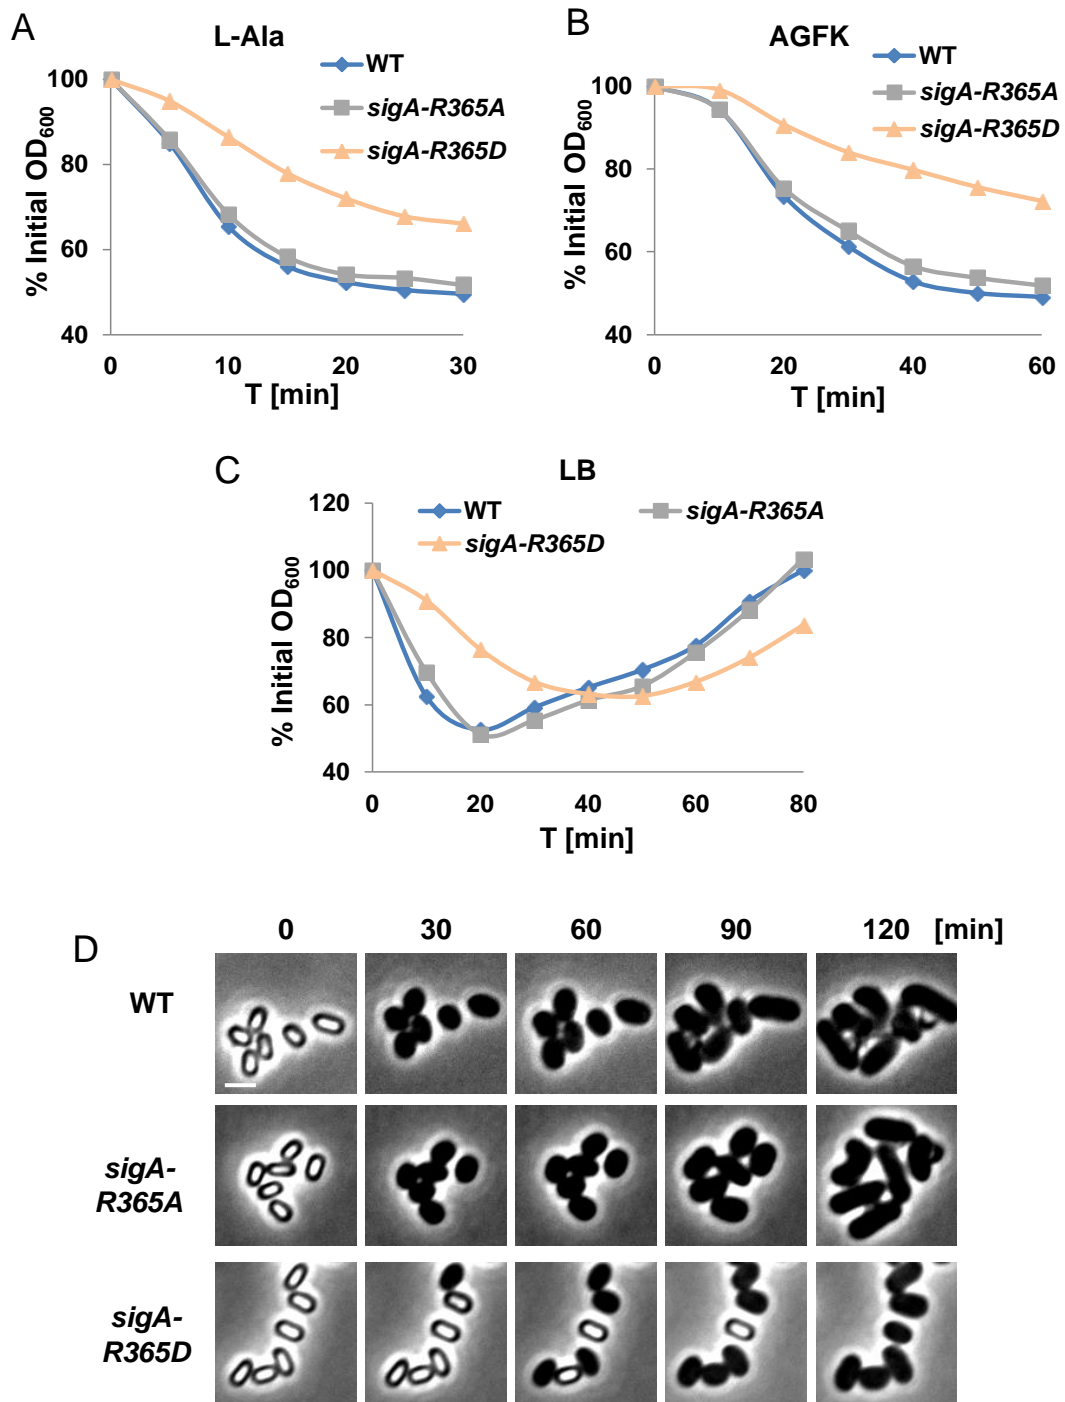

1

2 **Fig. S8: Dephosphorylation of SigA contributes to spore germination**

3 (A-C) Spores of PY79 (WT), BZ90 (*sigA-R365A*) and BZ91 (*sigA-R365D*) strains were

4 incubated with L-Ala (A), AGFK (B) or LB (C) and OD<sub>600</sub> was measured at the indicated

1 time points. Data are presented as percentage of the initial OD<sub>600</sub> of spore suspension.  
2 Germination assays were carried out in triplicates, and representative data are presented.  
3 (*D*) Spores of PY79 (WT), BZ90 (*sigA-R365A*) and BZ91 (*sigA-R365D*) strains were  
4 incubated on LB agar and monitored by time lapse microscopy. Shown are phase contrast  
5 images from a representative experiment out of 3 independent biological repeats. Scale  
6 bar represents 1 μm.  
7

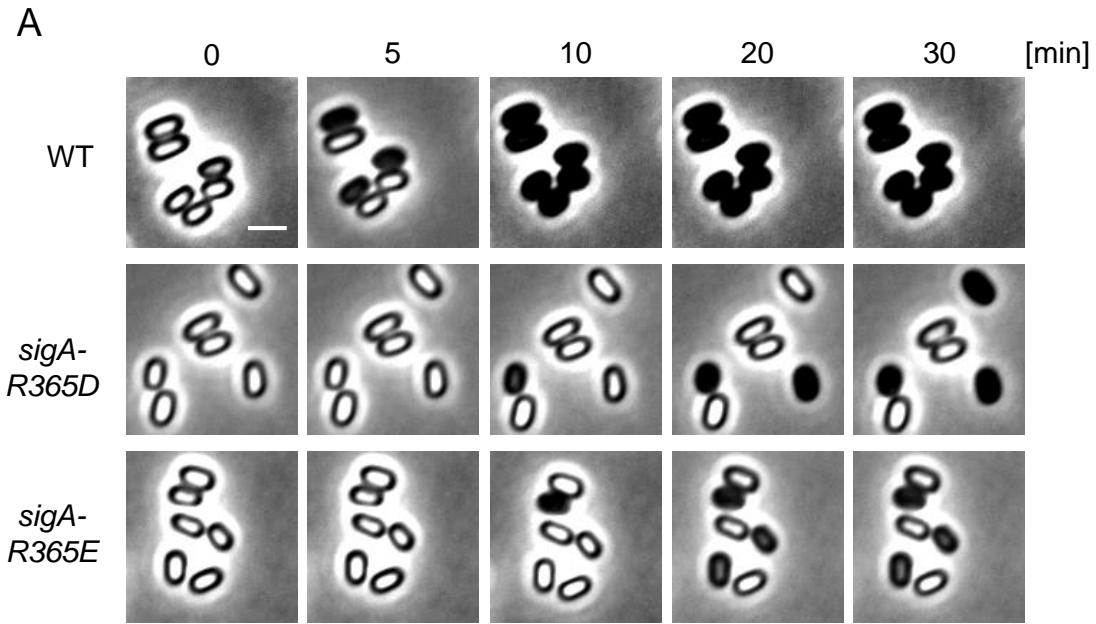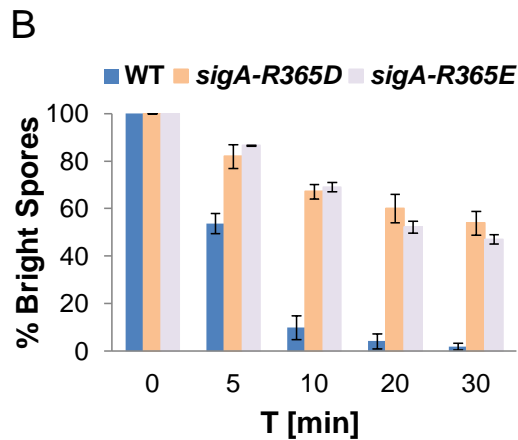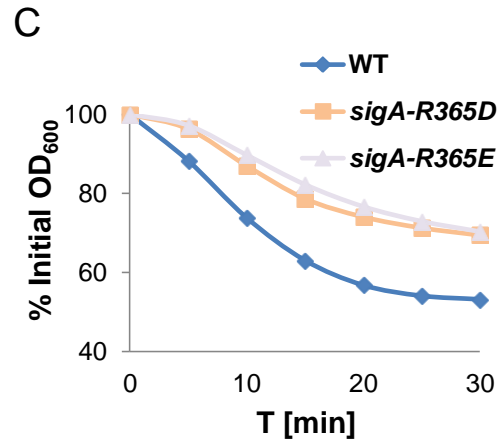

1

2 **Fig. S9: *sigA-R365E* mutant spores show germination defect similar to that of spores**  
 3 **harboring *sigA-R365D***

4 (A) Spores of PY79 (WT), BZ91 (*sigA-R365D*) and BZ143 (*sigA-R365E*) were incubated  
 5 on agarose supplemented with L-Ala (10 mM) and monitored by time lapse microscopy.  
 6 Shown are phase contrast images from a representative experiment out of 3 independent  
 7 biological repeats. Scale bar represents 1  $\mu$ m.

1 (B) Spores of PY79 (WT), BZ91 (*sigA-R365D*) and BZ143 (*sigA-R365E*) strains were  
2 incubated on agarose supplemented with L-Ala (10 mM) and monitored by time lapse  
3 microscopy. Data are presented as percentage of the initial number of the phase bright  
4 spores. Shown are average values and SD obtained from 3 independent biological repeats  
5 ( $n \geq 300$  for each strain).

6 (C) Spores of PY79 (WT), BZ91 (*sigA-R365D*) and BZ143 (*sigA-R365E*) strains were  
7 incubated with L-Ala (10 mM) and OD<sub>600</sub> was measured at the indicated time points.  
8 Data are presented as percentage of the initial OD<sub>600</sub> of spore suspension. Germination  
9 assays were carried out in triplicates, and representative data are presented. Decreasing  
10 OD<sub>600</sub> signifies spore germination.

11

12

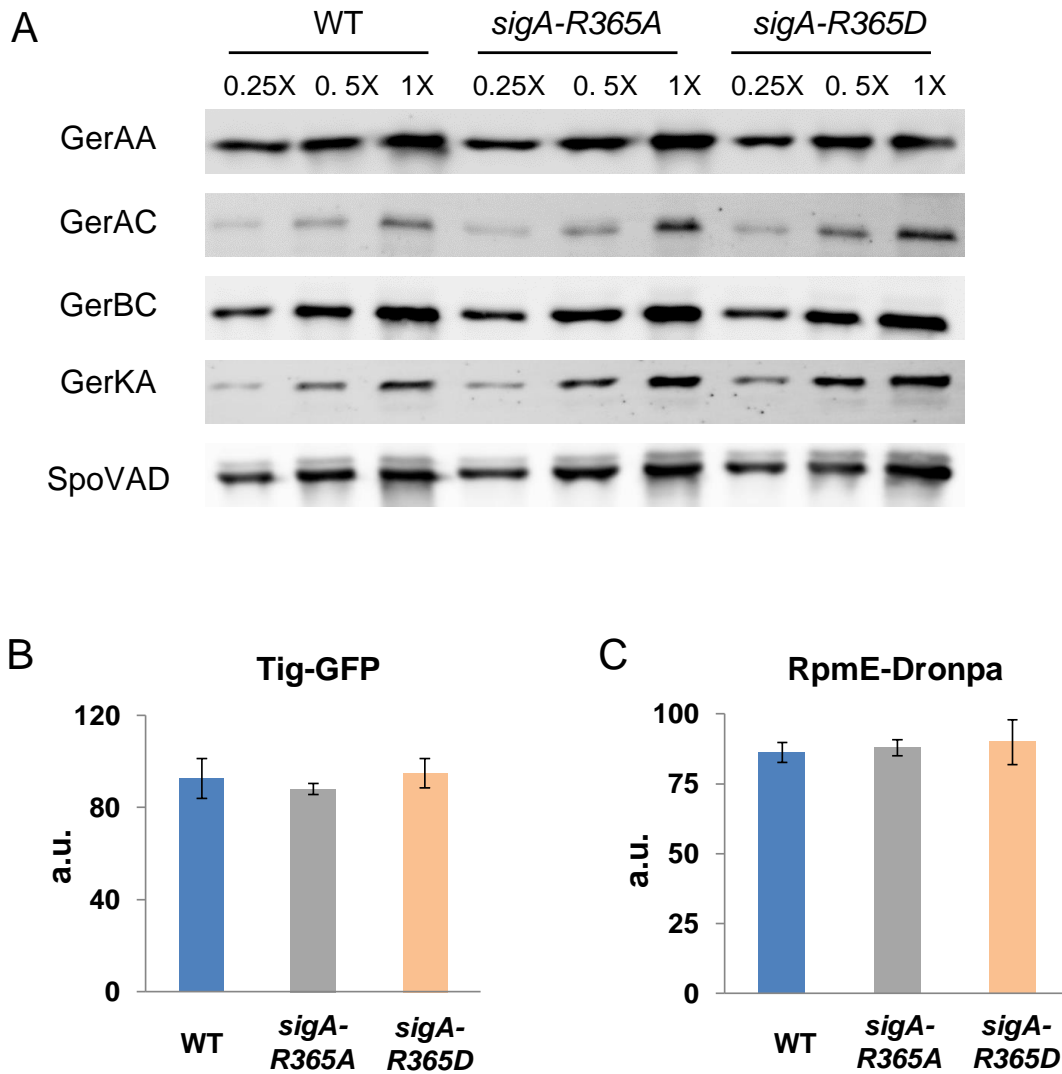

1

2 **Fig. S10: Determination of the levels of spore germination proteins**

3 (A) Equal amounts of protein extracts from spores of PY79 (WT), BZ90 (*sigA-R365A*)  
 4 and BZ91 (*sigA-R365D*) strains were subjected to SDS-PAGE. Western blot analysis  
 5 using antibodies against GerAA, GerAC, GerBC, GerKA, and SpoVAD was conducted.  
 6 Dilutions of the different samples were loaded on the same gel for comparison.

7 (B) Dormant spores of LS50 (WT, *tig-gfp*), BZ127 (*sigA-R365A*, *tig-gfp*), and BZ128  
 8 (*sigA-R365D*, *tig-gfp*) were observed by fluorescence microscopy. Shown are average

1 values and SD of the fluorescence signal in arbitrary units (a.u.) obtained from 3  
2 independent biological repeats ( $n \geq 300$  for each strain).  
3 (C) Dormant spores of LS108 (WT, *rpmE-dronpa*), BZ131 (*sigA-R365A*, *rpmE-dronpa*),  
4 and BZ132 (*sigA-R365D*, *rpmE-dronpa*) were processed as in (B).

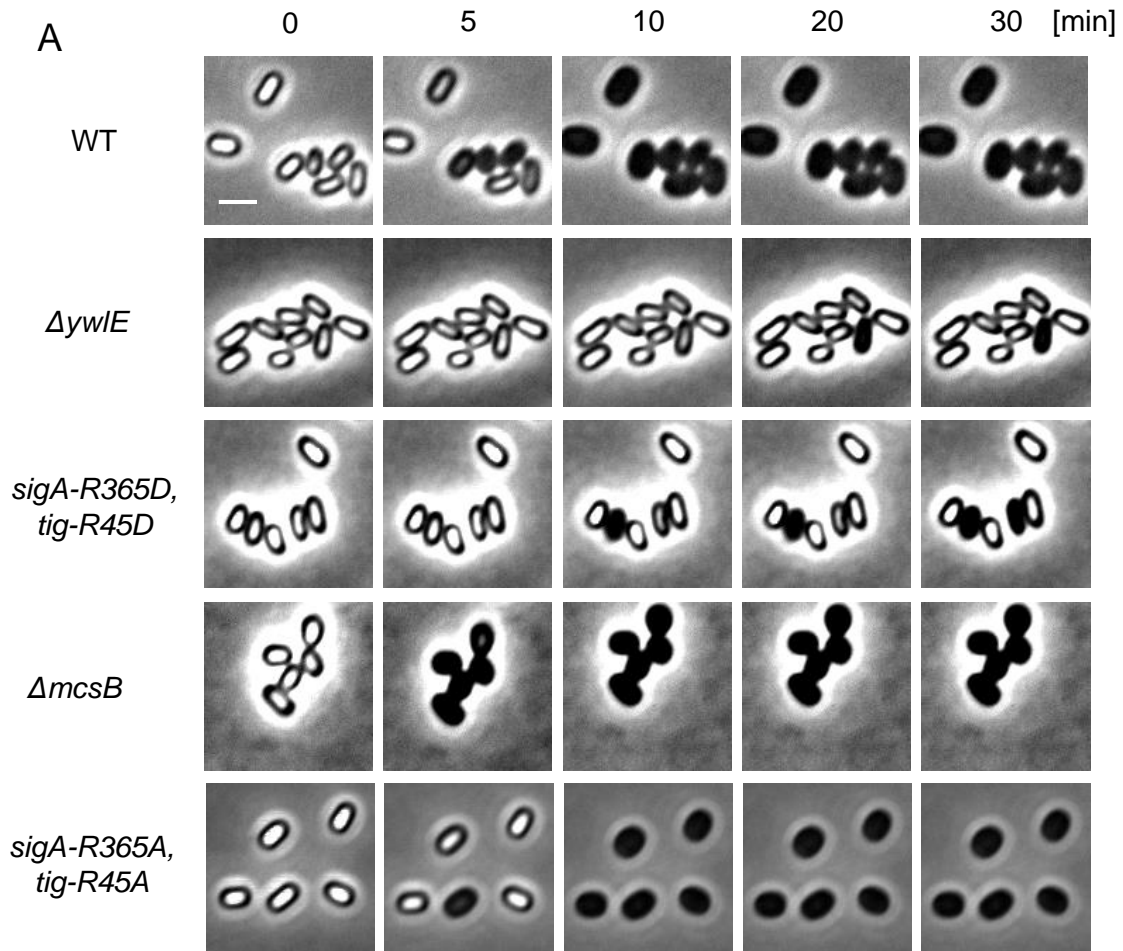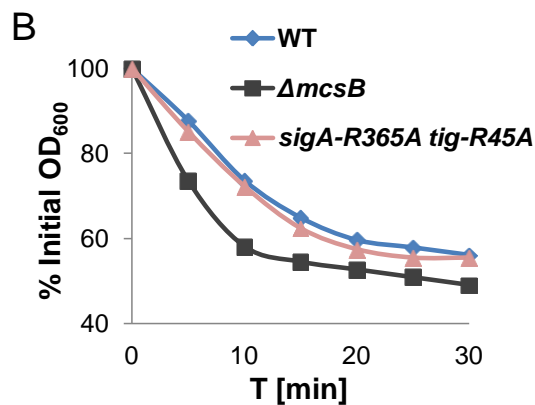

1

2 **Fig. S11: Combining *sigA* and *tig* phosphomimetic mutations failed to recapitulate**  
 3 **the germination phenotypes of  $\Delta wIE$  and  $\Delta mcsB$  spores**

4 (A) Spores of PY79 (WT), BZ16 ( $\Delta wIE$ ), BZ104 (*tig-R45D*, *sigA-R365D*), BZ129

5 ( $\Delta mcsB$ ) and BZ139 (*tig-R45A*, *sigA-R365A*) strains were incubated on agarose

1 supplemented with L-Ala (10 mM) and monitored by time lapse microscopy. Shown are  
2 phase contrast images from a representative experiment out of 3 independent biological  
3 repeats. Scale bar represents 1  $\mu\text{m}$ .

4 (B) Spores of PY79 (WT), BZ129 ( $\Delta mcsB$ ) and BZ139 (*tig-R45A*, *sigA-R365A*) strains  
5 were incubated with L-Ala (10 mM) and OD<sub>600</sub> was measured at the indicated time  
6 points. Data are presented as percentage of the initial OD<sub>600</sub> of spore suspension.  
7 Germination assays were carried out in triplicates, and representative data are presented.  
8 Decreasing OD<sub>600</sub> signifies spore germination.

9



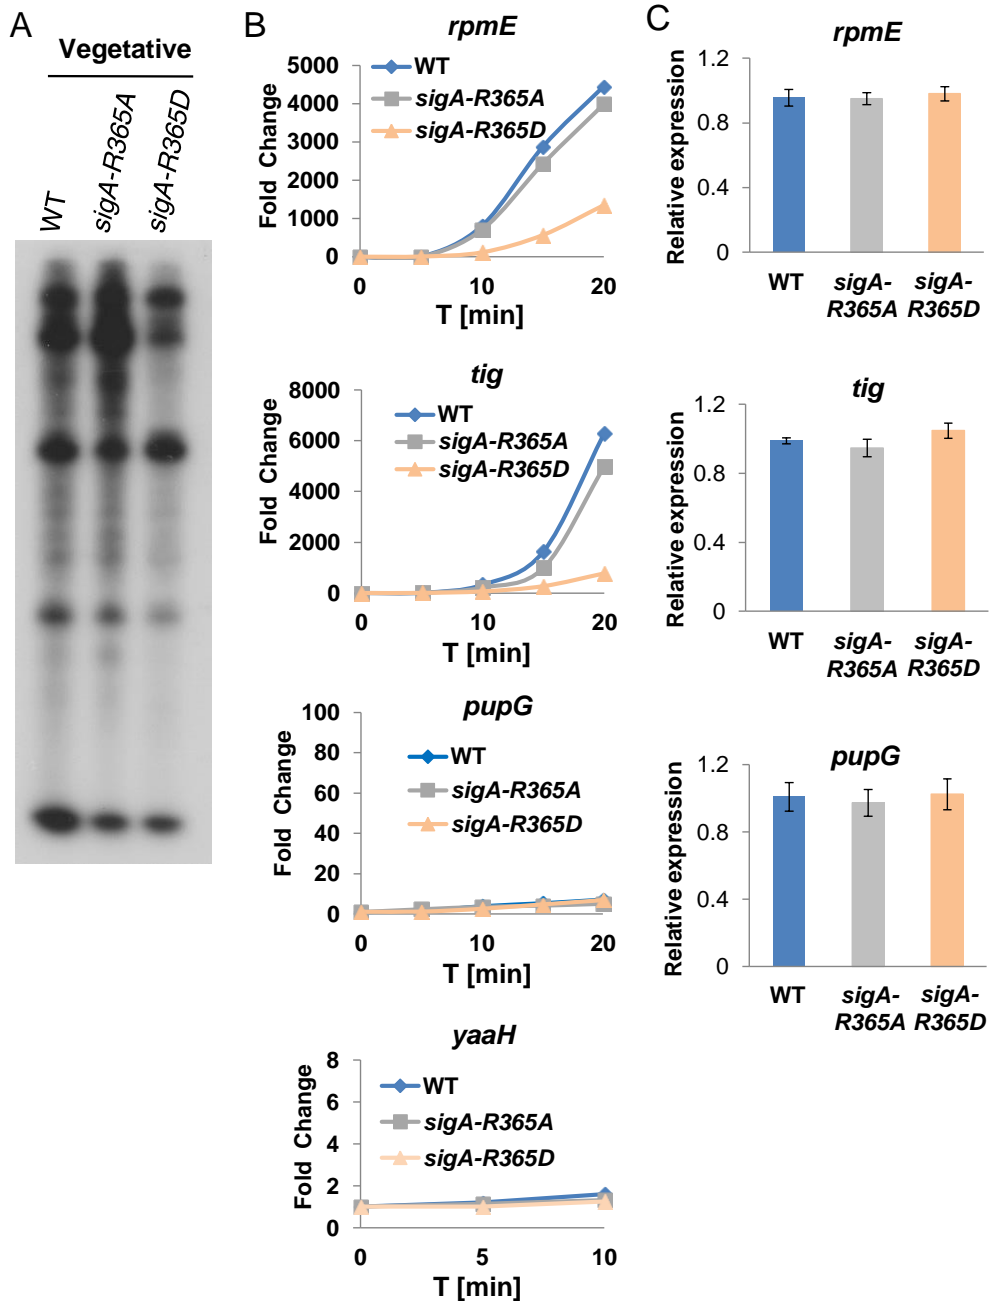

1

2 **Fig. S12: Measuring transcription during spore revival**

3 (A) *In vitro* transcription reaction was carried out in whole extracts from vegetative cells  
 4 of PY79 (WT), BZ90 (*sigA-R365A*) and BZ91 (*sigA-R365D*) strains, in transcription  
 5 buffer supplemented with NTPs (ATP, CTP, GTP, UTP, [ $\alpha$ -<sup>32</sup>P]-UTP). After 40 min of  
 6 incubation at 37°C the reaction was stopped, RNA was purified and radioactively labeled

1 RNAs were analyzed in 8% polyacrylamide gels, and bands were visualized by  
2 autoradiography. The analysis was carried out in two biological repeats, and a  
3 representative experiment is presented.

4 (B) Spores of PY79 (WT), BZ90 (*sigA-R365A*) and BZ91 (*sigA-R365D*) strains were  
5 incubated in LB or L-Ala to trigger germination, collected by centrifugation at indicated  
6 time and their RNA were extracted. The mRNA levels of selective genes, *tig*, *rpmE*,  
7 *pupG*, and *yaaH* were determined by quantitative RT-PCR. The result is presented as the  
8 fold change of target gene expression after germination relative to that before  
9 germination. The Assays were carried out in triplicates, and representative data are  
10 presented.

11 (C) RNA were extracted from PY79 (WT), BZ90 (*sigA-R365A*) and BZ91 (*sigA-R365D*)  
12 vegetative cells grown to the mid logarithmic phase. The mRNA levels of selective  
13 genes, *tig*, *rpmE*, and *pupG* were determined by quantitative RT-PCR. Transcript levels  
14 are relative to that of WT strain. Each bar represents an average value and s.d. of three  
15 independent experiments.

16

17

1 **Supplementary Tables**

2 **Table S1: Phospho-sites detected in dormant spores**

3 Shown is the phosphoproteome of BZ16 ( $\Delta ywIE$ ) dormant spores. Table S1b contains  
4 only phosphorylation sites on R. Table S1c contains all detected phosphorylation sites on  
5 STYR.

6

7

8

1 **Table S2: *B. subtilis* strains used in this study**

| Strain | Genotype                              | Comments                                                                                                                                 |
|--------|---------------------------------------|------------------------------------------------------------------------------------------------------------------------------------------|
| PY79   | Wild type                             | (18)                                                                                                                                     |
| LS5    | <i>metE::mls</i>                      | Laboratory stock                                                                                                                         |
| BZ16   | <i>ywlE::mls</i>                      | The ORF of <i>ywlE</i> was replaced by <i>mls</i> gene using a long-flanking-homology PCR with primers <i>ywlE</i> -KO-P1- P4 (Table S3) |
| LS26   | <i>rpmE::kan</i>                      | Laboratory stock                                                                                                                         |
| LS38   | <i>tig::kan</i>                       | Laboratory stock                                                                                                                         |
| LS50   | <i>tig-gfp-spc</i>                    | Laboratory stock                                                                                                                         |
| AR68   | <i>pupG-gfp-spc</i>                   | Laboratory stock                                                                                                                         |
| AR71   | <i>malS-gfp-spc</i>                   | Laboratory stock                                                                                                                         |
| LS76   | <i>pupG::kan</i>                      | Laboratory stock                                                                                                                         |
| BZ90   | <i>sigA-R365A</i>                     | <i>sigA-R365A</i> allele was constructed by allele replacement technique, transforming PY79 with plasmid pBZ90.                          |
| BZ91   | <i>sigA-R365D</i>                     | <i>sigA-R365D</i> allele was constructed by allele replacement technique, transforming PY79 with plasmid pBZ91.                          |
| BZ97   | <i>tig-R45D</i>                       | <i>tig-R45D</i> allele was constructed by allele replacement technique, transforming PY79 with plasmid pBZ97.                            |
| BZ98   | <i>tig-R45A</i>                       | <i>tig-R45A</i> allele was constructed by allele replacement technique, transforming PY79 with plasmid pBZ98.                            |
| BZ102  | <i>tig-R45D</i> ,<br><i>metE::mls</i> | <i>tig-R45D</i> , <i>metE::mls</i> allele was constructed by transformation of BZ97 with genomic DNA from LS5.                           |
| BZ103  | <i>tig-R45A</i> ,                     | <i>tig-R45A</i> , <i>metE::mls</i> allele was constructed by                                                                             |

|       |                                                    |                                                                                                                                          |
|-------|----------------------------------------------------|------------------------------------------------------------------------------------------------------------------------------------------|
|       | <i>metE::mIs</i>                                   | transformation of BZ98 with genomic DNA from LS5.                                                                                        |
| BZ104 | <i>tig-R45D, sigA-R365D</i>                        | <i>tig-R45D, sigA-R365D</i> allele was constructed by allele replacement technique, transforming BZ97 with plasmid pBZ91.                |
| BZ106 | <i>tig-R45D, malS-gfp-spc</i>                      | BZ97 was transformed with pAR71 ( <i>malS-gfp-spc</i> )                                                                                  |
| BZ107 | <i>tig-R45A, malS-gfp-spc</i>                      | BZ98 was transformed with pAR71 ( <i>malS-gfp-spc</i> )                                                                                  |
| BZ108 | <i>tig-R45D-gfp-spc</i>                            | BZ97 was transformed with pLS50( <i>tig-gfp-spc</i> )                                                                                    |
| BZ109 | <i>tig-R45A-gfp-spc</i>                            | BZ98 was transformed with pLS50( <i>tig-gfp-spc</i> )                                                                                    |
| BZ118 | <i>tig-gfp-spc, rpsB-mcherry-kan</i>               | LS50 was transformed with pAR5 ( <i>rpsB-gfp-mcherry-kan</i> )                                                                           |
| BZ119 | <i>tig-R45D-gfp-spc, rpsB-mcherry-kan</i>          | BZ108 was transformed with pAR5 ( <i>rpsB-gfp-mcherry-kan</i> )                                                                          |
| BZ120 | <i>tig-R45A -gfp-spc, rpsB-mcherry-kan</i>         | BZ109 was transformed with pAR5 ( <i>rpsB-gfp-mcherry-kan</i> )                                                                          |
| BZ127 | <i>sigA-R365D, tig-gfp-spc</i>                     | BZ91 was transformed with pLS50 ( <i>tig-gfp-spc</i> )                                                                                   |
| BZ128 | <i>sigA-R365A, tig-gfp-spc</i>                     | BZ90 was transformed with pLS50 ( <i>tig-gfp-spc</i> )                                                                                   |
| BZ129 | <i>mcsB::tet, P<sub>ctsR</sub>-clpC</i>            | The ORF of <i>mcsB</i> was replaced by <i>tet</i> gene using a long-flanking-homology PCR with primers <i>mcsB</i> -KO-P1- P6 (Table S3) |
| BZ130 | <i>ywlE::mIs, mcsB::tet, P<sub>ctsR</sub>-clpC</i> | BZ 129 was transformed with genomic DNA of BZ16                                                                                          |
| BZ131 | <i>sigA-R365A, rpmE-dronpa-spc</i>                 | BZ90 was transformed with pLS146 ( <i>rpmE-dronpa-spc</i> )                                                                              |
| BZ132 | <i>sigA-R365D,</i>                                 | BZ91 was transformed with pLS146 ( <i>rpmE-</i>                                                                                          |

|        |                                                                                                     |                                                                                                                           |
|--------|-----------------------------------------------------------------------------------------------------|---------------------------------------------------------------------------------------------------------------------------|
|        | <i>rpmE-dronpa-spc</i>                                                                              | <i>dronpa-spc</i> )                                                                                                       |
| BZ139  | <i>tig-R45A, sigA-R365A</i>                                                                         | <i>tig-R45A, sigA-R365A</i> allele was constructed by allele replacement technique, transforming BZ98 with plasmid pBZ90. |
| BZ141  | <i>tig-R45E</i>                                                                                     | <i>tig-R45E</i> allele was constructed by allele replacement technique, transforming PY79 with plasmid pBZ141.            |
| BZ143  | <i>sigA-R365E</i>                                                                                   | <i>sigA-R365E</i> allele was constructed by allele replacement technique, transforming PY79 with plasmid pBZ143.          |
| BZ144  | <i>tig-R45A, pupG-gfp-spc</i>                                                                       | BZ98 was transformed with pAR68 ( <i>pupG-gfp-spc</i> )                                                                   |
| BZ145  | <i>tig-R45D, pupG-gfp-spc</i>                                                                       | BZ97 was transformed with pAR68 ( <i>pupG-gfp-spc</i> )                                                                   |
| DS8274 | <i>pEP25</i><br><i>TnLacJump</i><br><i>cat amp mls</i><br><i>mariner-HimarI</i><br><i>ori(TS)Bs</i> | A gift from Daniel B. Kearns (Indiana University)                                                                         |

1

2 Long-flanking-homology PCR replacement strategy was based on (19) and the resultant  
3 PCR product was used to transform PY79. For some of the constructs, Gibson Assembly  
4 kit (New England Biolabs) was utilized to assemble the PCR products.

5

6

1 **Table S3: Primers used in this study**

| <b>Primer name</b>   | <b>Primer sequence</b>                                          |
|----------------------|-----------------------------------------------------------------|
| <i>ywlE</i> -KO-P1   | 5'-ATTCAAGAATATCAACAGGGTGGAAGACGG-3'                            |
| <i>ywlE</i> -KO-P2   | 5'-CTGAGCGAGGGAGCAGAAGAAACGGCGACTTCGTTTCTTTT<br>ATTGGTA-3'      |
| <i>ywlE</i> -KO-P3   | 5'-GTTGACCAGTGCTCCCTGAATCTGCAAACAGGTCATTTG<br>CAAATCCTG-3'      |
| <i>ywlE</i> -KO-P4   | 5'-CTGAATGGTTTCAACAAGAACAGGAGACTT-3'                            |
| <i>mcsB</i> -KO-P1   | 5'-CGAGTGTTAGATCAAAATGGCAAGG-3'                                 |
| <i>mcsB</i> -KO-P2   | 5'-CTGAGCGAGGGAGCAGAATACTCCTGTTCCCTC<br>CTCACTATCTG-3'          |
| <i>mcsB</i> -KO-P3   | 5'-GTTGACCAGTGCTCCCTGGAGCTGGGTTTTTTTG<br>TATTTTGGTTTATTGG-3'    |
| <i>mcsB</i> -KO-P4   | 5'-CTGTAATCTTCCAAACATCATCACTCAAC<br>CCCCTCCTTTACTGA-3'          |
| <i>mcsB</i> -KO-P5   | 5'-TCAGTAAAGGAGGGGGTTGAGTGATGAT<br>GTTTGGAAAGATTACAGAACGAGC -3' |
| <i>mcsB</i> -KO-P6   | 5'-CATCAAGAGTCGTTGCACCAATACATTG-3'                              |
| <i>tig</i> -BamHI-U  | 5'-TAGGGATCCCATTTGTACGTTTTATATCCGTTCCAGCCG -3'                  |
| <i>tig</i> -SalI-L   | 5'-TAGGTCGACGTACTCCTCAGGGAATGTCACTTCAACATC-3'                   |
| <i>tig</i> -R45A-F   | 5'-CAAGTTTCAATTCCTGGATTTCGCTAAAGGTAAAATTCCTCG<br>CGG -3'        |
| <i>tig</i> -R45A-R   | 5'-CCGCGAGGAATTTTACCTTTAGCGAATCCAGGAATTGAAAC<br>TTG-3'          |
| <i>tig</i> -R45D-F   | 5'-CAAGTTTCAATTCCTGGATTTCGATAAAGGTAAAATTCCTCG<br>CGG-3'         |
| <i>tig</i> -R45D-R   | 5'- CCGCGAGGAATTTTACCTTTATCGAATCCAGGAATTGAAAC<br>TTG-3'         |
| <i>sigA</i> -BamHI-U | 5'-TAGGGATCCGATCCATGAAGGAAACATGGGCCTGATG-3'                     |
| <i>sigA</i> -SalI-L  | 5'-TAGGTCGACCTTTTCAGCAGATTTGCTTTCTCCTCCG-3'                     |

|                      |                                                                       |
|----------------------|-----------------------------------------------------------------------|
| <i>sigA</i> -R365A-F | 5'- ACTAAGACATCCTAGCAGAAGTAAAGCTTTGAAAGATTT<br>CCTTGAATAAGA -3'       |
| <i>sigA</i> -R365A-R | 5'-TCTTATTCAAGGAAATCTTTCAAAGCTTTACTTCTGCTAG<br>GATGTCTTAGT -3'        |
| <i>sigA</i> -R365D-F | 5'- AAATAAGACATCCTAGCAGAAGTAAAGATTTGAAAGAT<br>TTCCTTGAATAAGATG -3'    |
| <i>sigA</i> -R365D-R | 5'- CATCTTATTCAAGGAAATCTTTCAAATCTTTACTTCTGCT<br>AGGATGTCTTAGTTT -3'   |
| <i>tig</i> -R45E-F   | 5'- AGTTTCAATTCCTGGATTTCGAAAAAGGTAAAATTCCTCGCG<br>-3'                 |
| <i>tig</i> -R45E-R   | 5'- CGCGAGGAATTTTACCTTTTTTCGAATCCAGGAATTGAACT<br>-3'                  |
| <i>sigA</i> -R365E-F | 5'-GGAACTAAGACATCCTAGCAGAAGTAAAGAATTGAAAGA<br>TTTCCTTGAATAAGATG -3    |
| <i>sigA</i> -R365E-R | 5'- CATCTTATTCAAGGAAATCTTTCAATTCTTTACTTCTGCTA<br>GGATGTCTTAGTTTCC -3' |
| 3019                 | 5'-TGGATCGAATTCCAAAAAGCAACAGTTAAATGC<br>GCTTG-3'                      |
| 3020                 | 5'-TGGATCCTCGAGCTTAAGACCGTATTTTTTGTTAA<br>AGCG-3'                     |
| <i>yoxA</i> -RT-U    | 5'-CACAAGCAGCTGGATGATGT-3'                                            |
| <i>yoxA</i> -RT-L    | 5'-ACCCATGTGTAAGGCTCAGG-3'                                            |
| <i>tig</i> -RT-U     | 5'-TAGTTGGCCTTGAAGCAGGT-3'                                            |
| <i>tig</i> -RT-L     | 5'-CGAATTCATCGTCAAGCTCA-3'                                            |
| <i>rpmE</i> -RT-U    | 5'-GCAACAGTTAAATGCGCTTG-3'                                            |
| <i>rpmE</i> -RT-L    | 5'-TTTGTTAAAGCGATCAACACG-3'                                           |
| <i>pupG</i> -RT-U    | 5'-GGCTGAAAAGATTGCGAAAG-3'                                            |
| <i>pupG</i> -RT-L    | 5'-ATGCAGGAAATGCCAAGAAC-3'                                            |



|                                |                                                |
|--------------------------------|------------------------------------------------|
| <i>yaaH</i> -RT-U              | 5'-GGATCCTTTTGAACGACGAA-3'                     |
| <i>yaaH</i> -RT-L              | 5'-TCGATGGAAAAGATCCCTTG-3'                     |
| <i>recA</i> -Vitro-U           | 5'-GAAACAGAGGCCGTTATCTTAGAG-3'                 |
| <i>recA</i> -Vitro-L           | 5'-TTATTAGCTTGGTACAGTAGAAATTCTTGTATCT-3'       |
| Primers used for Northern blot |                                                |
| <i>rpmE</i> - <i>bio</i> -P1   | Biotin- CCGCAAGCGCATTTAACTGTTGC-3'             |
| <i>rpmE</i> - <i>bio</i> -P2   | Biotin- GGGTGGCATTTCAGAGCAAATCTCAACGCGTACC -3' |
| <i>rpmE</i> - <i>bio</i> -P3   | Biotin- GCGATCAACACGACCATCAGCAGAAGCG -3'       |
| <i>pupG</i> - <i>bio</i> -P1   | Biotin- CCGGCATGCCCTTCAACAGTAGATACCGGG -3'     |
| <i>pupG</i> - <i>bio</i> -P2   | Biotin- CTGGCGCCGAAATCTGCTTCGTTTGGCCCG -3'     |
| <i>pupG</i> - <i>bio</i> -P3   | Biotin- GCAGGAAATGCCAAGAACCCGCATTCCCGC -3'     |

1

2 All primers were designed during this study, and synthesized by Integrated DNA

3 Technologies (IDT).

4

5

## 1 Supplemental References

- 2 1. Harwood CR, Cutting SM (1990) *Molecular biological methods for Bacillus* (Wiley,  
3 Chichester ; New York) pp xxxv, 581 p.
- 4 2. Rosenberg A, *et al.* (2015) Phosphoproteome dynamics mediate revival of bacterial  
5 spores. *BMC biology* 13:76.
- 6 3. Patrick JE, Kearns DB (2008) MinJ (YvjD) is a topological determinant of cell division  
7 in *Bacillus subtilis*. *Mol Microbiol* 70(5):1166-1179.
- 8 4. Schmidt A, *et al.* (2014) Quantitative phosphoproteomics reveals the role of protein  
9 arginine phosphorylation in the bacterial stress response. *Mol Cell Proteomics* 13(2):537-  
10 550.
- 11 5. Cox J, Mann M (2008) MaxQuant enables high peptide identification rates,  
12 individualized p.p.b.-range mass accuracies and proteome-wide protein quantification.  
13 *Nat Biotechnol* 26(12):1367-1372.
- 14 6. Cox J, *et al.* (2011) Andromeda: a peptide search engine integrated into the MaxQuant  
15 environment. *J Proteome Res* 10(4):1794-1805.
- 16 7. Elias JE, Gygi SP (2007) Target-decoy search strategy for increased confidence in large-  
17 scale protein identifications by mass spectrometry. *Nat Methods* 4(3):207-214.
- 18 8. Maguire BA, Wondrack LM, Contillo LG, Xu Z (2008) A novel chromatography system  
19 to isolate active ribosomes from pathogenic bacteria. *RNA* 14(1):188-195.
- 20 9. Sinai L, Rosenberg A, Smith Y, Segev E, Ben-Yehuda S (2015) The molecular timeline  
21 of a reviving bacterial spore. *Mol cell* 57(4):695-707.
- 22 10. Dieterich DC, *et al.* (2007) Labeling, detection and identification of newly synthesized  
23 proteomes with bioorthogonal non-canonical amino-acid tagging. *Nat Protoc* 2(3):532-  
24 540.
- 25 11. Segev E, Smith Y, Ben-Yehuda S (2012) RNA dynamics in aging bacterial spores. *Cell*  
26 148(1-2):139-149.
- 27 12. Schmittgen TD, Livak KJ (2008) Analyzing real-time PCR data by the comparative C(T)  
28 method. *Nat Protoc* 3(6):1101-1108.
- 29 13. Ramirez-Peralta A, *et al.* (2012) Effects of the SpoVT regulatory protein on the  
30 germination and germination protein levels of spores of *Bacillus subtilis*. *J Bacteriol*  
31 194(13):3417-3425.
- 32 14. Zaborske JM, *et al.* (2014) A nutrient-driven tRNA modification alters translational  
33 fidelity and genome-wide protein coding across an animal genus. *PLoS biology*  
34 12(12):e1002015.
- 35 15. Barshishat S, *et al.* (2018) OxyS small RNA induces cell cycle arrest to allow DNA  
36 damage repair. *The EMBO journal* 37(3):413-426.
- 37 16. Segev E, Rosenberg A, Mamou G, Sinai L, Ben-Yehuda S (2013) Molecular kinetics of  
38 reviving bacterial spores. *J Bacteriol* 195(9):1875-1882.
- 39 17. Dubey GP, *et al.* (2016) Architecture and characteristics of bacterial nanotubes. *Dev Cell*  
40 36(4):453-461.

- 1 18. Youngman P, Perkins JB, Losick R (1984) Construction of a cloning site near one end of  
2 Tn917 into which foreign DNA may be inserted without affecting transposition in  
3 *Bacillus subtilis* or expression of the transposon-borne erm gene. *Plasmid* 12(1):1-9.
- 4 19. Guerout-Fleury AM, Shazand K, Frandsen N, Stragier P (1995) Antibiotic-resistance  
5 cassettes for *Bacillus subtilis*. *Gene* 167(1-2):335-336.
- 6
- 7
